# Supplementary material
Source: Elsevier journal article supplement (https://comptes-rendus.academie-sciences.fr/biologies/article/10.1016/j.crvi.2014.09.001/file/attach/mmc1.pdf)
Supplement: mmc1 [file mmc1.pdf]

## SUPPLEMENTARY MATERIAL

### Resurrection of Indian-Ocean humbug damselfish, *Dascyllus abudafur* (Forsskål) from synonymy with its Pacific-Ocean sibling, *Dascyllus aruanus* (L.)

Philippe Borsa\*, Andrianus Sembiring, Cécile Fauvelot, Wei-Jen Chen

\* Correspondence: [philippe.borsa@ird.fr](mailto:philippe.borsa@ird.fr); [philippeborsa@gmail.com](mailto:philippeborsa@gmail.com)

Tables S1-S5 and Figs. S1-S7 here appended.

#### References

- G.R. Allen, M.V. Erdmann, Reef fishes of the East Indies, vols. I-III, Tropical Reef Research, Perth, 2012, 1292 pp.
- C. Fauvelot, G. Bernardi, S. Planes, Reductions in the mitochondrial DNA diversity of coral reef fish provide evidence of population bottlenecks resulting from Holocene sea-level change, *Evolution* 57 (2003) 1571-1583.
- N. Hubert, C. P.Meyer, H.J. Bruggemann, F. Guérin, R.J. L. Komeno, B. Espiau, R. Causse, J.T. Williams, S. Planes, Cryptic diversity in Indo-Pacific coral-reef fishes revealed by DNA-barcoding provides new support to the Centre-of-Overlap hypothesis, *PloS One* 7 (2012) e28987.
- P. Laboute, R. Grandperrin, Poissons de Nouvelle-Calédonie, Catherine Ledru, Nouméa, 2000, 520 pp.
- S.-Y.V. Liu, F.-T. Chang, P. Borsa, W.-J. Chen, C.-F. Dai, Phylogeography of the humbug damselfish, *Dascyllus aruanus* (Linnaeus, 1758): evidence of Indo-Pacific vicariance and genetic differentiation of peripheral populations, *Biol. J. Linn Soc.* xx (2014) xxx-xxx. DOI: 10.1111/bij.12378
- S. McCafferty, E. Bermingham, B. Quenouille, S. Planes, G. Hoelzer, K. Asoh, Historical biogeography and molecular systematics of the Indo-Pacific genus *Dascyllus* (Teleostei: Pomacentridae), *Mol. Ecol.* 11 (2002) 1377–1392.
- J.E. Randall, Randall's tank photos, Collection of 10,000 large-format photos (slides) of dead fishes, 1997a, unpublished.
- J.E. Randall, Randall's underwater photos, Collection of almost 2,000 underwater photos (slides), 1997b, unpublished.
- J.E. Randall, Reef and shore fishes of the South Pacific: New Caledonia to Tahiti and the Pitcairn Islands, University of Hawai'i Press, Honolulu, 2005, 707 pp.
- J.M. Raynal, E.D. Crandall, P.H. Barber, G.N. Mahardika, M.C. Lagman, K.E. Carpenter, Basin isolation and oceanographic features influencing lineage divergence in the humbug damselfish (*Dascyllus aruanus*) in the Coral Triangle, *Bull. Mar. Sci.* 90 (2014) 53-532.

**Table S1** List of humbug damselfish (*Dascyllus abudafur* and *D. aruanus*) samples used in this article, with frequency of mitochondrial haplotype (either “Indian” or “Pacific”). Samples listed according to geographic location, from West to East. *ATP6/8* ATP synthetase 6, 8 gene; *CO1* cytochrome-oxidase 1 gene; *CR* control region; *cytb* cytochrome b gene; *N*, sample size

| Region,<br>Location            | Site                   | <i>N</i> | Marker        | Haplotype frequency |         | Reference                |
|--------------------------------|------------------------|----------|---------------|---------------------|---------|--------------------------|
|                                |                        |          |               | Indian              | Pacific |                          |
| Indian Ocean                   |                        |          |               |                     |         |                          |
| Red Sea                        | Gulf of Aqaba          | 15       | <i>cytb</i>   | 100%                | -       | Liu et al. (2014)        |
| Zanzibar                       | -                      | 1        | <i>CR</i>     | 100%                | -       | present work             |
| Kenya                          | -                      | 1        | <i>ATP6/8</i> | 100%                | -       | McCafferty et al (2002)  |
| Mozambique Channel             | Europa I.              | 15       | <i>cytb</i>   | 100%                | -       | Liu et al. (2014)        |
| Mozambique Channel             | Juan de Nova I.        | 5        | <i>cytb</i>   | 100%                | -       | Liu et al. (2014)        |
| Madagascar                     | Toliara                | 12       | <i>cytb</i>   | 100%                | -       | Liu et al. (2014)        |
| Mozambique Channel             | Nosy Be                | 3        | <i>CO1</i>    | 100%                | -       | Hubert et al. (2012)     |
| Mozambique Channel             | Glorieuses Is.         | 5        | <i>cytb</i>   | 100%                | -       | Liu et al. (2014)        |
| Mozambique Channel             | Glorieuses Is.         | 3        | <i>CR</i>     | 100%                | -       | present work             |
| Mascarene Islands              | Reunion I.             | 2        | <i>ATP6/8</i> | 100%                | -       | McCafferty et al. (2002) |
| Mascarene Islands              | Reunion I.             | 4        | <i>CO1</i>    | 100%                | -       | Hubert et al. (2012)     |
| Maldives archipelago           | -                      | 2        | <i>ATP6/8</i> | 100%                | -       | McCafferty et al. (2002) |
| Coral Triangle                 |                        |          |               |                     |         |                          |
| Thailand                       | -                      | 2        | <i>ATP6/8</i> | 100%                | -       | McCafferty et al. (2002) |
| Java Sea, Indonesia            | Karimunjawa Is.        | 19       | <i>CR</i>     | 100%                | -       | Raynal et al. (2014)     |
| Lombok Strait, Indonesia       | Serangan               | 5        | <i>cytb</i>   | 20%                 | 80%     | present work             |
| South China Sea                | Paracels Is.           | 12       | <i>cytb</i>   | -                   | 100%    | Liu et al. (2014)        |
| Lombok Strait, Indonesia       | Gili Is.               | 21       | <i>CR</i>     | -                   | 100%    | Raynal et al. (2014)     |
| South China Sea                | Dongsha I.             | 16       | <i>cytb</i>   | -                   | 100%    | Liu et al. (2014)        |
| Sulawesi Sea                   | Semporna, Sabah        | 23       | <i>CR</i>     | -                   | 100%    | Raynal et al. (2014)     |
| Sulu Sea                       | Palawan I.             | 12       | <i>CR</i>     | -                   | 100%    | Raynal et al. (2014)     |
| Sulawesi Sea                   | Tawi-Tawi I.           | 46       | <i>CR</i>     | -                   | 100%    | Raynal et al. (2014)     |
| Flores Sea, Indonesia          | Komodo I.              | 33       | <i>CR</i>     | -                   | 100%    | Raynal et al. (2014)     |
| Taiwan                         | Houbihu                | 27       | <i>cytb</i>   | -                   | 100%    | Liu et al. (2014)        |
| Tomimi Bay                     | Togian Is.             | 18       | <i>CR</i>     | -                   | 100%    | Raynal et al. (2014)     |
| Sibuyan Sea, Philippines       | Romblon                | 36       | <i>CR</i>     | -                   | 100%    | Raynal et al. (2014)     |
| Sulu Sea                       | Guimeras               | 10       | <i>CR</i>     | -                   | 100%    | Raynal et al. (2014)     |
| Bohol Sea, Philippines         | Siquijor               | 20       | <i>CR</i>     | -                   | 100%    | Raynal et al. (2014)     |
| Banda Sea, Indonesia           | Wakatobi               | 17       | <i>CR</i>     | -                   | 100%    | Raynal et al. (2014)     |
| Cebu Strait, Philippines       | Caohagan I., Lapu-Lapu | 32       | <i>cytb</i>   | -                   | 100%    | Liu et al. (2014)        |
| Cebu Strait, Philippines       | Olango                 | 42       | <i>CR</i>     | -                   | 100%    | Raynal et al. (2014)     |
| Philippine Sea                 | Sorsogon               | 21       | <i>CR</i>     | -                   | 100%    | Raynal et al. (2014)     |
| Bohol Sea, Philippines         | Camiguin               | 18       | <i>CR</i>     | -                   | 100%    | Raynal et al. (2014)     |
| Philippines                    | -                      | 1        | <i>ATP6/8</i> | -                   | 100%    | McCafferty et al. (2002) |
| Philippines                    | -                      | 5        | <i>CR</i>     | -                   | 100%    | present work             |
| Sulawesi Sea                   | Manado                 | 16       | <i>CR</i>     | -                   | 100%    | Raynal et al. (2014)     |
| Sulawesi Sea                   | General Santos         | 16       | <i>CR</i>     | -                   | 100%    | Raynal et al. (2014)     |
| Davao Gulf, Philippines        | Davao                  | 13       | <i>CR</i>     | -                   | 100%    | Raynal et al. (2014)     |
| Philippine Sea                 | Dinagat                | 20       | <i>CR</i>     | -                   | 100%    | Raynal et al. (2014)     |
| Raja Ampat, West Papua         | Pulau Fam              | 33       | <i>cytb</i>   | -                   | 100%    | Liu et al. (2014)        |
| Pacific Ocean                  |                        |          |               |                     |         |                          |
| Ryukyu archipelago             | Sesoko I.              | 25       | <i>cytb</i>   | -                   | 100%    | Liu et al. (2014)        |
| Japan                          | -                      | 2        | <i>ATP6/8</i> | -                   | 100%    | McCafferty et al. (2002) |
| Guam                           | -                      | 2        | <i>ATP6/8</i> | -                   | 100%    | McCafferty et al. (2002) |
| Guam                           | -                      | 1        | <i>CR</i>     | -                   | 100%    | present work             |
| New Guinea                     | -                      | 2        | <i>ATP6/8</i> | -                   | 100%    | McCafferty et al. (2002) |
| Bismarck Sea, Papua New Guinea | Madang                 | 6        | <i>cytb</i>   | -                   | 100%    | present work             |
| New Caledonia                  | -                      | 2        | <i>ATP6/8</i> | -                   | 100%    | McCafferty et al. (2002) |
| New Caledonia                  | SW Lagoon              | 38       | <i>cytb</i>   | -                   | 100%    | Liu et al. (2014)        |
| Fiji                           | -                      | 2        | <i>CR</i>     | -                   | 100%    | present work             |
| Society Islands                | Moorea I.              | 2        | <i>ATP6/8</i> | -                   | 100%    | McCafferty et al. (2002) |
| Society Islands                | Moorea I.              | 4        | <i>CO1</i>    | -                   | 100%    | Hubert et al. (2012)     |
| Society Islands                | Moorea I.              | 25       | <i>cytb</i>   | -                   | 100%    | Liu et al. (2014)        |
| Society Islands                | Moorea I.              | 10       | <i>CR</i>     | -                   | 100%    | Fauvelot et al. (2003)   |
| Society Islands                | Tetiaroa I.            | 8        | <i>CR</i>     | -                   | 100%    | Fauvelot et al. (2003)   |
| Tuamotu Archipelago            | Rangiroa Atoll         | 10       | <i>CR</i>     | -                   | 100%    | Fauvelot et al. (2003)   |
| Tuamotu Archipelago            | Takapoto Atoll         | 7        | <i>CR</i>     | -                   | 100%    | Fauvelot et al. (2003)   |
| Gambier Archipelago            | Marutea Atoll          | 10       | <i>CR</i>     | -                   | 100%    | Fauvelot et al. (2003)   |

**Table S2** *Dascyllus abudafur* and *D. aruanus*. Differences in pigmentation of caudal fin, from photographs of specimens in public repositories, internet sites, and on Figs. S1-S7 here appended. Intensity of pigmentation of the basis of caudal fin was encoded from 3 (blackish) to 0 (no pigmentation). **BOLD** Barcode of Life Database (<http://www.barcodinglife.com/>), accessed 18 March 2014; *FishBase* (<http://www.fishbase.org/>), accessed 18 March 2014; *shaded* individuals that also have been sequenced at the mitochondrial locus

| Individual no. | Origin                           | Source                                                                    | Intensity of pigmentation |   |   |   |
|----------------|----------------------------------|---------------------------------------------------------------------------|---------------------------|---|---|---|
|                |                                  |                                                                           | 0                         | 1 | 2 | 3 |
| Daaru-u0       | Red Sea                          | Randall 1997b                                                             |                           |   |   | x |
| Daaru-u4       | Jordan, Red Sea                  | FishBase                                                                  |                           |   | x |   |
| -              | Jeddah, Red Sea                  | <a href="http://www.oceanfootage.com/">http://www.oceanfootage.com/</a>   |                           |   | x |   |
| -              | Jeddah, Red Sea                  | <a href="http://www.oceanfootage.com/">http://www.oceanfootage.com/</a>   |                           |   |   | x |
| -              | Jeddah, Red Sea                  | <a href="http://www.oceanfootage.com/">http://www.oceanfootage.com/</a>   |                           |   |   | x |
| -              | Jeddah, Red Sea                  | <a href="http://www.oceanfootage.com/">http://www.oceanfootage.com/</a>   |                           |   |   | x |
| Daaru-u1       | Mozambique, Mozamb. Channel      | FishBase                                                                  |                           |   |   | x |
| Europa 1       | Europa I., Mozamb. Channel       | Fig. S1                                                                   |                           |   |   | x |
| Europa 2       | Europa I., Mozamb. Channel       | Fig. S1                                                                   |                           |   |   | x |
| Europa 3       | Europa I., Mozamb. Channel       | Fig. S1                                                                   |                           |   |   | x |
| Europa 4       | Europa I., Mozamb. Channel       | Fig. S1                                                                   |                           |   |   | x |
| Europa 5       | Europa I., Mozamb. Channel       | Fig. S1                                                                   |                           |   |   | x |
| Europa 6       | Europa I., Mozamb. Channel       | Fig. S1                                                                   |                           |   | x |   |
| Europa 7       | Europa I., Mozamb. Channel       | Fig. S1                                                                   |                           |   | x |   |
| Europa 8       | Europa I., Mozamb. Channel       | Fig. S1                                                                   |                           |   | x |   |
| Europa 9       | Europa I., Mozamb. Channel       | Fig. S1                                                                   |                           |   | x |   |
| Europa 10      | Europa I., Mozamb. Channel       | Fig. S1                                                                   |                           | x |   |   |
| Europa 11      | Europa I., Mozamb. Channel       | Fig. S1                                                                   |                           | x |   |   |
| Europa 12      | Europa I., Mozamb. Channel       | Fig. S1                                                                   |                           |   | x |   |
| Europa 13      | Europa I., Mozamb. Channel       | Fig. S1                                                                   |                           |   |   | x |
| Europa 14      | Europa I., Mozamb. Channel       | Fig. S1                                                                   |                           |   |   | x |
| Europa 15      | Europa I., Mozamb. Channel       | Fig. S1                                                                   |                           |   |   | x |
| JdN 1          | Juan de Nova I., Mozamb. Channel | Fig. S2                                                                   |                           |   |   | x |
| JdN 2          | Juan de Nova I., Mozamb. Channel | Fig. S2                                                                   |                           |   |   | x |
| JdN 3          | Juan de Nova I., Mozamb. Channel | Fig. S2                                                                   |                           |   |   | x |
| JdN 4          | Juan de Nova I., Mozamb. Channel | Fig. S2                                                                   |                           |   |   | x |
| JdN 5          | Juan de Nova I., Mozamb. Channel | Fig. S2                                                                   |                           |   |   | x |
| NBE 187        | Nosy Be, Mozamb. Channel         | BOLD                                                                      |                           |   |   | x |
| NBE 188        | Nosy Be, Mozamb. Channel         | BOLD                                                                      |                           |   |   | x |
| NBE 189        | Nosy Be, Mozamb. Channel         | BOLD                                                                      |                           |   |   | x |
| REU 0004-01    | Reunion, Mascarene Is.           | BOLD                                                                      |                           |   |   | x |
| REU 0004-02    | Reunion, Mascarene Is.           | BOLD                                                                      |                           |   |   | x |
| REU 2764       | Reunion, Mascarene Is.           | BOLD                                                                      |                           |   | x |   |
| REU 2765       | Reunion, Mascarene Is.           | BOLD                                                                      |                           |   | x |   |
| Daaru-u5       | Mauritius, Mascarene Is.         | FishBase                                                                  |                           |   | x |   |
| Daaru-u6       | Mauritius, Mascarene Is.         | FishBase                                                                  |                           |   | x |   |
| -              | Maldives                         | <a href="http://www.travelswithhok.com">http://www.travelswithhok.com</a> |                           |   |   | x |
| -              | Maldives                         | <a href="http://www.travelswithhok.com">http://www.travelswithhok.com</a> |                           |   |   | x |
| -              | Maldives                         | <a href="http://www.travelswithhok.com">http://www.travelswithhok.com</a> |                           |   |   | x |
| -              | Maldives                         | <a href="http://www.travelswithhok.com">http://www.travelswithhok.com</a> |                           |   |   | x |
| -              | Maldives                         | <a href="http://www.travelswithhok.com">http://www.travelswithhok.com</a> |                           |   |   | x |
| -              | Maldives                         | <a href="http://www.travelswithhok.com">http://www.travelswithhok.com</a> |                           |   | x |   |
| -              | Maldives                         | <a href="http://www.travelswithhok.com">http://www.travelswithhok.com</a> |                           |   | x |   |
| -              | Maldives                         | <a href="http://www.travelswithhok.com">http://www.travelswithhok.com</a> |                           |   | x |   |
| -              | Maldives                         | <a href="http://www.travelswithhok.com">http://www.travelswithhok.com</a> |                           |   | x |   |
| Bali 1         | Singaraja, Bali                  | Fig. S2                                                                   |                           |   | x |   |
| Bali 2         | Singaraja, Bali                  | Fig. S2                                                                   |                           |   |   | x |
| Bali 3         | Singaraja, Bali                  | Fig. S2                                                                   |                           |   |   | x |
| IBRC 11.01.08  | Serangan, western Lombok Strait  | Fig. S6                                                                   |                           | x |   |   |
| IBRC 11.01.14  | Serangan, western Lombok Strait  | Fig. S6                                                                   |                           |   |   | x |
| IBRC 11.01.22  | Serangan, western Lombok Strait  | Fig. S6                                                                   |                           | x |   |   |
| IBRC 11.01.27  | Serangan, western Lombok Strait  | Fig. S6                                                                   |                           | x |   |   |
| IBRC 11.01.28  | Serangan, western Lombok Strait  | Fig. S6                                                                   | x                         |   |   |   |
| Lombok 1       | Gili Gede, eastern Lombok Strait | Fig. S7                                                                   | x                         |   |   |   |
| Lombok 2       | Gili Gede, eastern Lombok Strait | Fig. S7                                                                   | x                         |   |   |   |
| Lombok 3       | Gili Gede, eastern Lombok Strait | Fig. S7                                                                   | x                         |   |   |   |

**Table S2** (continued)

| Individual no. | Origin                            | Source                                                        | Intensity of pigmentation |   |   |   |
|----------------|-----------------------------------|---------------------------------------------------------------|---------------------------|---|---|---|
|                |                                   |                                                               | 0                         | 1 | 2 | 3 |
| Lombok 4       | Gili Gede, eastern Lombok Strait  | Fig. S7                                                       | x                         |   |   |   |
| Lombok 5       | Gili Gede, eastern Lombok Strait  | Fig. S7                                                       | x                         |   |   |   |
| Lombok 6       | Gili Gede, eastern Lombok Strait  | Fig. S7                                                       | x                         |   |   |   |
| Lombok 7       | Gili Gede, eastern Lombok Strait  | Fig. S7                                                       | x                         |   |   |   |
| Lombok 8       | Gili Gede, eastern Lombok Strait  | Fig. S7                                                       | x                         |   |   |   |
| Lombok 9       | Gili Gede, eastern Lombok Strait  | Fig. S7                                                       | x                         |   |   |   |
| Lombok 10      | Gili Gede, eastern Lombok Strait  | Fig. S7                                                       | x                         |   |   |   |
| Lombok 11      | Gili Gede, eastern Lombok Strait  | Fig. S7                                                       |                           |   | x |   |
| Lombok 12      | Gili Gede, eastern Lombok Strait  | Fig. S7                                                       | x                         |   |   |   |
| Lombok 13      | Gili Layar, eastern Lombok Strait | Fig. S7                                                       | x                         |   |   |   |
| Lombok 14      | Gili Layar, eastern Lombok Strait | Fig. S7                                                       | x                         |   |   |   |
| Lombok 15      | Gili Layar, eastern Lombok Strait | Fig. S7                                                       | x                         |   |   |   |
| Lombok 16      | Gili Layar, eastern Lombok Strait | Fig. S7                                                       | x                         |   |   |   |
| Lombok 17      | Gili Layar, eastern Lombok Strait | Fig. S7                                                       | x                         |   |   |   |
| Lombok 18      | Gili Layar, eastern Lombok Strait | Fig. S7                                                       | x                         |   |   |   |
| -              | Komodo I., Flores Sea             | <a href="http://www.sfups.org/">http://www.sfups.org/</a>     | x                         |   |   |   |
| -              | Komodo I., Flores Sea             | <a href="http://www.sfups.org/">http://www.sfups.org/</a>     | x                         |   |   |   |
| -              | Komodo I., Flores Sea             | <a href="http://www.sfups.org/">http://www.sfups.org/</a>     | x                         |   |   |   |
| -              | Komodo I., Flores Sea             | <a href="http://www.sfups.org/">http://www.sfups.org/</a>     | x                         |   |   |   |
| -              | Komodo I., Flores Sea             | <a href="http://www.sfups.org/">http://www.sfups.org/</a>     | x                         |   |   |   |
| -              | Komodo I., Flores Sea             | <a href="http://www.sfups.org/">http://www.sfups.org/</a>     | x                         |   |   |   |
| -              | Komodo I., Flores Sea             | <a href="http://www.sfups.org/">http://www.sfups.org/</a>     | x                         |   |   |   |
| -              | Komodo I., Flores Sea             | <a href="http://www.sfups.org/">http://www.sfups.org/</a>     | x                         |   |   |   |
| 042913-06      | Dongsha., South China Sea         | Fig. S2                                                       | x                         |   |   |   |
| WJC2243        | Dongsha., South China Sea         | Fig. S2                                                       | x                         |   |   |   |
| DS 1           | Dongsha., South China Sea         | Fig. S4                                                       | x                         |   |   |   |
| DS 2           | Dongsha., South China Sea         | Fig. S4                                                       | x                         |   |   |   |
| DS 3           | Dongsha., South China Sea         | Fig. S4                                                       | x                         |   |   |   |
| HLC-10828      | Philippines                       | BOLD                                                          | x                         |   |   |   |
| HLC-10829      | Philippines                       | BOLD                                                          | x                         |   |   |   |
| HLC-10830      | Philippines                       | BOLD                                                          |                           | x |   |   |
| HLC-10831      | Philippines                       | BOLD                                                          |                           | x |   |   |
| Daaru-u2       | Palawan, Philippines              | FishBase                                                      | x                         |   |   |   |
| Daaru-u3       | Philippines                       | Randall (1997a)                                               |                           | x |   |   |
| LL 1           | Lapu-Lapu I., Philippines         | Fig. S4                                                       | x                         |   |   |   |
| LL 2           | Lapu-Lapu I., Philippines         | Fig. S4                                                       | x                         |   |   |   |
| LL 3           | Lapu-Lapu I., Philippines         | Fig. S4                                                       | x                         |   |   |   |
| LL 4           | Lapu-Lapu I., Philippines         | Fig. S4                                                       | x                         |   |   |   |
| LL 5           | Lapu-Lapu I., Philippines         | Fig. S4                                                       | x                         |   |   |   |
| -              | Pulau Pef, Raja Ampat, West Papua | <a href="http://faroutphotos.com">http://faroutphotos.com</a> | x                         |   |   |   |
| Sayonek 1      | Pulau Sayonek, Raja Ampat         | Fig. 2B                                                       | x                         |   |   |   |
| Fam 1          | Pulau Fam, Raja Ampat, West Papua | Fig. S3                                                       |                           | x |   |   |
| Fam 2          | Pulau Fam, Raja Ampat, West Papua | Fig. S3                                                       | x                         |   |   |   |
| Fam 3          | Pulau Fam, Raja Ampat, West Papua | Fig. S3                                                       | x                         |   |   |   |
| Fam 4          | Pulau Fam, Raja Ampat, West Papua | Fig. S3                                                       |                           | x |   |   |
| Fam 5          | Pulau Fam, Raja Ampat, West Papua | Fig. S3                                                       | x                         |   |   |   |
| Fam 6          | Pulau Fam, Raja Ampat, West Papua | Fig. S3                                                       | x                         |   |   |   |
| Fam 7          | Pulau Fam, Raja Ampat, West Papua | Fig. S3                                                       | x                         |   |   |   |
| Fam 8          | Pulau Fam, Raja Ampat, West Papua | Fig. S3                                                       | x                         |   |   |   |
| Fam 9          | Pulau Fam, Raja Ampat, West Papua | Fig. S3                                                       | x                         |   |   |   |
| Fam 10         | Pulau Fam, Raja Ampat, West Papua | Fig. S3                                                       | x                         |   |   |   |
| Fam 11         | Pulau Fam, Raja Ampat, West Papua | Fig. S3                                                       | x                         |   |   |   |
| Fam 12         | Pulau Fam, Raja Ampat, West Papua | Fig. S3                                                       | x                         |   |   |   |
| Fam 13         | Pulau Fam, Raja Ampat, West Papua | Fig. S3                                                       | x                         |   |   |   |
| Fam 14         | Pulau Fam, Raja Ampat, West Papua | Fig. S3                                                       | x                         |   |   |   |
| Fam 15         | Pulau Fam, Raja Ampat, West Papua | Fig. S3                                                       | x                         |   |   |   |
| Fam 16         | Pulau Fam, Raja Ampat, West Papua | Fig. S3                                                       |                           | x |   |   |
| Fam 17         | Pulau Fam, Raja Ampat, West Papua | Fig. S3                                                       | x                         |   |   |   |
| Fam 18         | Pulau Fam, Raja Ampat, West Papua | Fig. S3                                                       | x                         |   |   |   |
| Fam 19         | Pulau Fam, Raja Ampat, West Papua | Fig. S3                                                       | x                         |   |   |   |
| Fam 20         | Pulau Fam, Raja Ampat, West Papua | Fig. S3                                                       |                           | x |   |   |
| Fam 21         | Pulau Fam, Raja Ampat, West Papua | Fig. S3                                                       | x                         |   |   |   |
| Fam 22         | Pulau Fam, Raja Ampat, West Papua | Fig. S3                                                       | x                         |   |   |   |
| Fam 23         | Pulau Fam, Raja Ampat, West Papua | Fig. S3                                                       | x                         |   |   |   |

| Individual                  | Origin                            | Source                                                    | Intensity of pigmentation |   |   |   |
|-----------------------------|-----------------------------------|-----------------------------------------------------------|---------------------------|---|---|---|
|                             |                                   |                                                           | 0                         | 1 | 2 | 3 |
| Fam 24                      | Pulau Fam, Raja Ampat, West Papua | Fig. S3                                                   | x                         |   |   |   |
| <b>Table S2 (continued)</b> |                                   |                                                           |                           |   |   |   |
| Individual no.              | Origin                            | Source                                                    | 0                         | 1 | 2 | 3 |
| Fam 25                      | Pulau Fam, Raja Ampat, West Papua | Fig. S3                                                   | x                         |   |   |   |
| Fam 26                      | Pulau Fam, Raja Ampat, West Papua | Fig. S3                                                   | x                         |   |   |   |
| Fam 27                      | Pulau Fam, Raja Ampat, West Papua | Fig. S3                                                   | x                         |   |   |   |
| Fam 28                      | Pulau Fam, Raja Ampat, West Papua | Fig. S3                                                   | x                         |   |   |   |
| Fam 29                      | Pulau Fam, Raja Ampat, West Papua | Fig. S3                                                   | x                         |   |   |   |
| Fam 30                      | Pulau Fam, Raja Ampat, West Papua | Fig. S3                                                   | x                         |   |   |   |
| Fam 31                      | Pulau Fam, Raja Ampat, West Papua | Fig. S3                                                   | x                         |   |   |   |
| Fam 32                      | Pulau Fam, Raja Ampat, West Papua | Fig. S3                                                   | x                         |   |   |   |
| Fam 33                      | Pulau Fam, Raja Ampat, West Papua | Fig. S3                                                   | x                         |   |   |   |
| PR161-1                     | Madang, Bismarck Sea              | Fig S2                                                    | x                         |   |   |   |
| PR161-2                     | Madang, Bismarck Sea              | Fig S2                                                    | x                         |   |   |   |
| PR161-3                     | Madang, Bismarck Sea              | Fig S2                                                    | x                         |   |   |   |
| PR161-4                     | Madang, Bismarck Sea              | Fig S2                                                    | x                         |   |   |   |
| -                           | Chuuk                             | Allen and Erdmann (2012)                                  | x                         |   |   |   |
| -                           | Yap                               | <a href="http://reefguide.org/">http://reefguide.org/</a> | x                         |   |   |   |
| -                           | Lord Howe I.                      | Randall (2005)                                            | x                         |   |   |   |
| -                           | New Caledonia                     | Laboute and Grandperrin (2000)                            | x                         |   |   |   |
| -                           | New Caledonia                     | Laboute and Grandperrin (2000)                            | x                         |   |   |   |
| -                           | New Caledonia                     | Laboute and Grandperrin (2000)                            | x                         |   |   |   |
| -                           | New Caledonia                     | Laboute and Grandperrin (2000)                            | x                         |   |   |   |
| -                           | New Caledonia                     | Laboute and Grandperrin (2000)                            | x                         |   |   |   |
| -                           | New Caledonia                     | Laboute and Grandperrin (2000)                            | x                         |   |   |   |
| -                           | New Caledonia                     | Laboute and Grandperrin (2000)                            | x                         |   |   |   |
| -                           | New Caledonia                     | Laboute and Grandperrin (2000)                            | x                         |   |   |   |
| -                           | New Caledonia                     | Laboute and Grandperrin (2000)                            | x                         |   |   |   |
| -                           | New Caledonia                     | Laboute and Grandperrin (2000)                            | x                         |   |   |   |
| -                           | New Caledonia                     | Laboute and Grandperrin (2000)                            | x                         |   |   |   |
| -                           | New Caledonia                     | Laboute and Grandperrin (2000)                            | x                         |   |   |   |
| Poé 1                       | Poé, New Caledonia                | Fig. S4                                                   | x                         |   |   |   |
| Poé 2                       | Poé, New Caledonia                | Fig. S4                                                   | x                         |   |   |   |
| Poé 3                       | Poé, New Caledonia                | Fig. S4                                                   | x                         |   |   |   |
| Poé 4                       | Poé, New Caledonia                | Fig. S4                                                   | x                         |   |   |   |
| Poé 5                       | Poé, New Caledonia                | Fig. S4                                                   | x                         |   |   |   |
| Poé 6                       | Poé, New Caledonia                | Fig. S4                                                   | x                         |   |   |   |
| Poé 7                       | Poé, New Caledonia                | Fig. S4                                                   | x                         |   |   |   |
| Poé 8                       | Poé, New Caledonia                | Fig. S4                                                   | x                         |   |   |   |
| Poé 9                       | Poé, New Caledonia                | Fig. S4                                                   | x                         |   |   |   |
| Poé 10                      | Poé, New Caledonia                | Fig. S4                                                   | x                         |   |   |   |
| SWLagoon 1                  | SW lagoon, New Caledonia          | Fig. S5                                                   | x                         |   |   |   |
| SWLagoon 2                  | SW lagoon, New Caledonia          | Fig. S5                                                   | x                         |   |   |   |
| SWLagoon 3                  | SW lagoon, New Caledonia          | Fig. S5                                                   | x                         |   |   |   |
| SWLagoon 4                  | SW lagoon, New Caledonia          | Fig. S5                                                   | x                         |   |   |   |
| SWLagoon 5                  | SW lagoon, New Caledonia          | Fig. S5                                                   | x                         |   |   |   |
| SWLagoon 6                  | SW lagoon, New Caledonia          | Fig. S5                                                   | x                         |   |   |   |
| SWLagoon 7                  | SW lagoon, New Caledonia          | Fig. S5                                                   | x                         |   |   |   |
| SWLagoon 8                  | SW lagoon, New Caledonia          | Fig. S5                                                   | x                         |   |   |   |
| SWLagoon 9                  | SW lagoon, New Caledonia          | Fig. S5                                                   | x                         |   |   |   |
| SWLagoon 10                 | SW lagoon, New Caledonia          | Fig. S5                                                   | x                         |   |   |   |
| Muaivuso 1                  | Viti Levu, Fiji                   | Fig. S4                                                   |                           | x |   |   |
| Muaivuso 2                  | Viti Levu, Fiji                   | Fig. S4                                                   | x                         |   |   |   |
| Muaivuso 3                  | Viti Levu, Fiji                   | Fig. S4                                                   | x                         |   |   |   |
| Muaivuso 4                  | Viti Levu, Fiji                   | Fig. S4                                                   | x                         |   |   |   |
| MBIO 556_1                  | Moorea, Society Is.               | BOLD                                                      | x                         |   |   |   |

**Table S3** Humbug damselfish, *Dascyllus abudafur* and *D. aruanus*. Cytochrome *b* gene haplotype frequency per sample. *Abbreviations for samples* as in Liu et al. (2014); *other abbreviations*: BA Singaraja, Bali Sea; MA Madang, Bismarck Sea; N sample size; n frequency of haplotype in total sample. Samples listed according to geographic location, from West to East

| GENBANK no. | Sample |    |    |    |    |    |    |    |    |    |    |    |    |    |  | n   |
|-------------|--------|----|----|----|----|----|----|----|----|----|----|----|----|----|--|-----|
|             | RS     | EU | JN | MD | GL | PI | DS | TW | LL | SK | RA | MA | NC | SI |  |     |
| KF754784    | 6      |    |    |    |    |    |    |    |    |    |    |    |    |    |  | 6   |
| KF754787    | 4      |    |    |    |    |    |    |    |    |    |    |    |    |    |  | 4   |
| KF754776    | 1      |    |    |    |    |    |    |    |    |    |    |    |    |    |  | 1   |
| KF754780    | 1      |    |    |    |    |    |    |    |    |    |    |    |    |    |  | 1   |
| KF754783    | 1      |    |    |    |    |    |    |    |    |    |    |    |    |    |  | 1   |
| KF754785    | 1      |    |    |    |    |    |    |    |    |    |    |    |    |    |  | 1   |
| KF754786    | 1      |    |    |    |    |    |    |    |    |    |    |    |    |    |  | 1   |
| KF754778    |        | 3  | 1  | 1  |    |    |    |    |    |    |    |    |    |    |  | 5   |
| KF754782    |        | 2  | 2  | 3  |    |    |    |    |    |    |    |    |    |    |  | 7   |
| KF754788    |        | 2  |    | 2  |    |    |    |    |    |    |    |    |    |    |  | 4   |
| KF754791    |        | 2  |    | 1  | 1  |    |    |    |    |    |    |    |    |    |  | 4   |
| KF754793    |        | 2  |    | 1  |    |    |    |    |    |    |    |    |    |    |  | 3   |
| KF754781    |        | 1  | 1  | 1  | 1  |    |    |    |    |    |    |    |    |    |  | 4   |
| KF754792    |        | 1  |    |    |    |    |    |    |    |    |    |    |    |    |  | 1   |
| KF754794    |        | 1  | 1  |    |    |    |    |    |    |    |    |    |    |    |  | 2   |
| KF754795    |        | 1  |    | 1  |    |    |    |    |    |    |    |    |    |    |  | 2   |
| KF754779    |        |    |    | 1  |    |    |    |    |    |    |    |    |    |    |  | 1   |
| KF754789    |        |    |    | 1  |    |    |    |    |    |    |    |    |    |    |  | 1   |
| KF754775    |        |    |    |    | 1  |    |    |    |    |    |    |    |    |    |  | 1   |
| KF754777    |        |    |    |    | 1  |    |    |    |    |    |    |    |    |    |  | 1   |
| KF754790    |        |    |    |    | 1  |    |    |    |    |    |    |    |    |    |  | 1   |
| KF754774    |        |    |    |    |    | 6  | 6  | 15 | 13 | 10 | 10 |    | 1  |    |  | 61  |
| KF754757    |        |    |    |    |    | 2  |    |    |    |    |    |    |    |    |  | 2   |
| KF754763    |        |    |    |    |    | 2  | 1  | 1  |    |    |    |    |    |    |  | 4   |
| KF754741    |        |    |    |    |    | 1  |    |    |    |    |    |    |    |    |  | 1   |
| KF754742    |        |    |    |    |    | 1  | 1  | 3  | 5  | 6  | 13 | 3  | 8  |    |  | 40  |
| KF754748    |        |    |    |    |    |    | 4  | 1  | 3  | 5  | 1  | 1  | 11 |    |  | 26  |
| KF754750    |        |    |    |    |    |    | 1  | 4  | 2  |    | 2  | 2  |    |    |  | 11  |
| KF754759    |        |    |    |    |    |    | 1  |    | 1  | 1  |    |    |    |    |  | 3   |
| KF754767    |        |    |    |    |    |    | 1  |    |    |    |    |    |    |    |  | 1   |
| KF754768    |        |    |    |    |    |    | 1  |    |    |    |    |    |    |    |  | 1   |
| KF754746    |        |    |    |    |    |    |    | 1  |    |    |    |    |    |    |  | 1   |
| KF754749    |        |    |    |    |    |    |    | 1  |    |    |    |    |    |    |  | 1   |
| KF754766    |        |    |    |    |    |    |    | 1  |    |    | 1  |    |    |    |  | 2   |
| KF754747    |        |    |    |    |    |    |    |    | 1  |    |    |    |    |    |  | 1   |
| KF754751    |        |    |    |    |    |    |    |    | 1  |    |    |    |    |    |  | 1   |
| KF754754    |        |    |    |    |    |    |    |    | 1  |    |    |    |    |    |  | 1   |
| KF754758    |        |    |    |    |    |    |    |    | 1  |    |    |    |    |    |  | 1   |
| KF754769    |        |    |    |    |    |    |    |    | 1  |    |    |    | 1  | 2  |  | 4   |
| KF754770    |        |    |    |    |    |    |    |    | 1  |    |    |    |    |    |  | 1   |
| KF754771    |        |    |    |    |    |    |    |    | 1  |    |    |    |    |    |  | 1   |
| KF754772    |        |    |    |    |    |    |    |    | 1  |    |    |    |    |    |  | 1   |
| KF754740    |        |    |    |    |    |    |    |    |    | 1  |    |    |    |    |  | 1   |
| KF754762    |        |    |    |    |    |    |    |    |    | 1  |    |    |    |    |  | 1   |
| KF754773    |        |    |    |    |    |    |    |    |    | 1  |    |    |    |    |  | 1   |
| KF754764    |        |    |    |    |    |    |    |    |    |    | 2  |    |    |    |  | 2   |
| KF754765    |        |    |    |    |    |    |    |    |    |    | 1  |    |    |    |  | 1   |
| KF754737    |        |    |    |    |    |    |    |    |    |    | 1  |    |    |    |  | 1   |
| KF754736    |        |    |    |    |    |    |    |    |    |    | 1  |    |    |    |  | 1   |
| KF754755    |        |    |    |    |    |    |    |    |    |    | 1  |    |    |    |  | 1   |
| KF754756    |        |    |    |    |    |    |    |    |    |    |    |    | 6  |    |  | 6   |
| KF754738    |        |    |    |    |    |    |    |    |    |    |    |    | 4  |    |  | 4   |
| KF754739    |        |    |    |    |    |    |    |    |    |    |    |    | 1  |    |  | 1   |
| KF754743    |        |    |    |    |    |    |    |    |    |    |    |    | 1  |    |  | 1   |
| KF754744    |        |    |    |    |    |    |    |    |    |    |    |    | 1  |    |  | 1   |
| KF754745    |        |    |    |    |    |    |    |    |    |    |    |    | 1  |    |  | 1   |
| KF754735    |        |    |    |    |    |    |    |    |    |    |    |    | 1  |    |  | 1   |
| KF754752    |        |    |    |    |    |    |    |    |    |    |    |    | 1  |    |  | 1   |
| KF754753    |        |    |    |    |    |    |    |    |    |    |    |    | 1  |    |  | 1   |
| KF754733    |        |    |    |    |    |    |    |    |    |    |    |    |    | 19 |  | 19  |
| KF754761    |        |    |    |    |    |    |    |    |    |    |    |    |    | 2  |  | 2   |
| KF754734    |        |    |    |    |    |    |    |    |    |    |    |    |    | 1  |  | 1   |
| KF754760    |        |    |    |    |    |    |    |    |    |    |    |    |    | 1  |  | 1   |
| N           | 15     | 15 | 5  | 12 | 5  | 12 | 16 | 27 | 32 | 25 | 33 | 6  | 38 | 25 |  | 266 |

**Table S4** Partial cytochrome-*b* gene sequences (in FASTA format) of 5 humbug damselfish individuals from Serangan, western Lombok Strait

---

Sequence

>IBRC 110114\_Serangan  
ATGGCCAGCTTCCGCAAAACTCACCCACTGCTTAAAGCAGCAAATGATGCAGTAATCGAC  
CTGCCTACGCCATCCAACATCTCTGTCTGATGGAACCTTGGCTCCCTCCTAGGACTCTGCT  
TAATCGCCCAGATCCTCACAGGCCTCTTTCTCGCCATAACATTATACATCAGATATCGCCAC  
AGCTTTCTCTCCGTAACCCACATCTGCCGAGATGTCAACTACGGATGACTTATCCGGAAT  
ATACACGCTAACGGCGCATCCTTCTTTATCTGCATCTACCTCCACATCGGACGA GGAC  
TCTACTACGGCTCATTCCCTTCACAAAGAGACATGAAACGTAGGAGTAATCCTCCTCCTCTT  
AGTAATAATAACAGCTTTCTGAGGCTACGTGCTTCCCTGAGGCCAAATATCCCTCTGAGG  
TGCCACCGTAATCACAACCTCCTATCAGCCTTCCCTACGTCCGTTGATTCCCTAGTCCAAT  
GAATCTGAGGGGGCTTCTCAGTAGACAATGCCACTCTCACCCGATTCTTTGCC TTCCACTT  
CCTTTTTCCCTTTGTAATTGTAGCCATAACCCTCGTTCACTTATCTTCCCTCCACGAAACTG  
GATCAAAACAACCCAACTGGCCTAACTCGGATGCAGACAAAATCTCCTTCCACCCTTATTT  
CTCCTACAAGGACATCCTCGGCTTTGCAGTCTGCTACTAGCACTAATTTCACTAGCACTA  
TTCGCCCCCAATCTTCTCGGAGACCCCGACAACCTTC-----  
-----  
-----

>IBRC 110127\_Serangan  
ATGGCCAGCTTCCGCAAAACTCACCCACTGCTTAAAGCAGCAAATGATGCAGTAATCGAC  
CTGCCTACGCCATCCAACATCTCTGTCTGATGGAACCTTGGCTCCCTCCTAGGACTCTGCT  
TAATCGCCCAGATCCTCACAGGCCTCTTTCTCGCCATAACATTATACATCAGATATCGCCACA  
GCTTTCTCTCCGTAACCCACATCTGCCGAGATGTCAACTACGGATGACTTATCCGGAATA  
TACACGCTAACGGCGCATCCTTCTTTATCTGCATCTACCTCCACATCGGACGA GGACT  
CTACTACGGCTCATTCCCTTCACAAAGAGACATGAAACGTAGGAGTAATCCTCCTCCTCTTA  
GTAATGATAACAGCTTTCTGAGGCTACGTGCTTCCCTGAGGCCAAATATCCCTCTGAGGT  
GCCACGTAATCACAACCTCCTGTCAGCCTTCCCTACGTCCGTTGATTCCCTAGTCCAAT  
GAATCTGAGGGGGCTTCTCAGTAGACAATGCCACTCTCACCCGATTCTTTGCCCTTCCACTT  
CCTTTTTCCCTTTGTAATTGTAGCCATAACCCTCGTTCACTTATCTTCCCTCACGAAACTG  
GATCAAAACAACCCAACTGGCCTAACTCGGATGCAGACAAAATCTCCTTCCACCCTTATTT  
CTCCTACAAGGACATCCTCGGCTTTGCAGTCTGCTACTAGCACTAATTTCACTAGCACTA  
TTTGCCCCCAATCTTCTCGGAGACCCCGACAACCTTCATCCCGCTAAC CCCATGGTGACAC  
CACCTCAC-----  
-----  
-----

>IBRC 110122\_Serangan  
ATGGCCAGCTTCCGCAAAACTCACCCACTGCTTAAAGCAGCAAATGATGCAGTAATCGACC  
TGCCCTACGCCATCCAACATCTCTGTCTGATGGAACCTTGGCTCCCTCCTAGGACTCTGCTT  
AATCGCCCAGATCCTCACAGGCCTCTTTCTCGCCATAACATTATACATCAGATATCGCCACA  
GCTTTCTCTCCGTAACCCACATCTGCCGAGATGTCAACTACGGATGACTTATCCGGAATA  
TACACGCTAACGGCGCATCCTTCTTTATCTGCATCTACCTCCACATCGGACGA GGACT  
CTACTACGGCTCATTCCCTTCACAAAGAGACATGAAACGTAGGAGTAATCCTCCTCCTCTTA  
GTAATGATAACAGCTTTCTGAGGCTACGTGCTTCCCTGAGGCCAAATATCCCTCTGAGGT  
GCCACGTAATCACAACCTCCTGTCAGCCTTCCCTACGTCCGTTGATTCCCTAGTCCAAT  
GAATCTGAGGGGGCTTCTCAGTAGACAATGCCACTCTCACCCGATTCTTTGCCCTTCCACTT  
CCTTTTTCCCTTTGTAATTGTAGCCATAACCCTCGTTCACTTATCTTCCCTCCACGAAACTG  
GATCAAAACAACCCAACTGGCCTAACTCGGATGCAGACAAAATCTCCTTCCACCCTTATTT  
CTCCTACAAGGACATCCTCGGCTTTGCAGTCTGCTACTAGCACTAATTTCACTAGCACTA  
TTCGCCCCCAATCTTCTCGGAGACCCCGACAACCTTCATCCCGCTAAC CCCATGGTGACAC  
CACCTCAC-----  
-----  
-----

>IBRC 110128\_Serangan  
ATGGCCAGCTTCCGCAAAACTCACCCACTGCTTAAAGCAGCAAATGATGCAGTAATCGACC  
TGCCCTACGCCATCCAACATCTCTGTCTGATGGAACCTTGGCTCCCTCCTAGGACTCTGCTT  
AATCGCCCAGATCCTCACAGGCCTCTTTCTCGCCATAACATTATACATCAGATATCGCCACA  
GCTTTCTCTCCGTAACCCACATCTGCCGAGATGTCAACTACGGATGACTTATCCGGAATA  
TACACGCTAACGGCGCATCCTTCTTTATCTGCATCTACCTCCACATCGGACGA GGACT  
CTACTACGGCTCATTCCCTTCACAAAGAGACATGAAACGTAGGAGTAATCCTCCTCCTCTTA  
GTAATGATAACAGCTTTCTGAGGCTACGTGCTTCCCTGAGGCCAAATATCCCTCTGAGGT  
GCCACGTAATCACAACCTCCTGTCAGCCTTCCCTACGTCCGTTGATTCCCTAGTCCAAT  
GAATCTGAGGGGGCTTCTCAGTAGACAATGCCACTCTCACCCGATTCTTTGCCCTTCCACTT  
CCTTTTTCCCTTTGTAATTGTAGCCATAACCCTCGTTCACTTATCTTCCCTCCACGAAACTG  
GATCAAAACAACCCAACTGGCCTAACTCGGATGCAGACAAAATCTCCTTCCACCCTTATTT  
CTCCTACAAGGACATCCTCGGCTTTGCAGTCTGCTACTAGCACTAATTTCACTAGCACTA  
TTCGCCCCCAATCTTCTCGGAGACCCCGACAACCTTCATCCCGCTAAC CCCATGGTGACAC  
CACCTCAC-----  
-----  
-----

>IBRC 110108\_Serangan  
ATGGCCAGCTTCCGCAAAACTCACCCACTGCTTAAAGCAGCAAATGATGCAGTAATCGACC  
TGCCCTACGCCATCCAACATCTCTGTCTGATGGAACCTTGGCTCCCTCCTAGGACTCTGCTT  
AATCGCCCAGATCCTCACAGGCCTCTTTCTCGCCATAACATTATACATCAGATATCGCCACA  
GCTTTCTCTCCGTAACCCACATCTGCCGAGATGTCAACTACGGATGACTTATCCGGAATA  
TACACGCTAACGGCGCATCCTTCTTTATCTGCATCTACCTCCACATCGGACGA GGACT  
CTACTACGGCTCATTCCCTTCACAAAGAGACATGAAACGTAGGAGTAATCCTCCTCCTCTTA  
GTAATGATAACAGCTTTCTGAGGCTACGTGCTTCCCTGAGGCCAAATATCCCTCTGAGGT  
GCCACGTAATCACAACCTCCTGTCAGCCTTCCCTACGTCCGTTGATTCCCTAGTCCAAT  
GAATCTGAGGGGGCTTCTCAGTAGACAATGCCACTCTCACCCGATTCTTTGCCCTTCCACTT  
CCTTTTTCCCTTTGTAATTGTAGCCATAACCCTCGTTCACTTATCTTCCCTCCACGAAACTG  
GATCAAAACAACCCAACTGGCCTAACTCGGATGCAGACAAAATCTCCTTCCACCCTTATTT  
CTCCTACAAGGACATCCTCGGCTTTGCAGTCTGCTACTAGCACTAATTTCACTAGCACTA  
TTCGCCCCCAATCTTCTCGGAGACCCCGACAACCTTCATCCCGCTAAC CCCATGGTGACAC  
CACCTCAC-----  
-----  
-----

---

CCTTTTCCCTTTGTAATTGTAGCCATAACCCTCGTTCACCTTATCTTCCTCCACGAACTG  
GATCAAACAACCCAACTGGCCTAAACTCGGATGCAGACAAAATCTCCTTCCACCCTTATT  
CTCCTACAAGGACATCCTCGGCTTTGCAGTCCTGCTACTAGCACTAATTTCACTAGCACTA  
TTCGCCCCAATCTTCTCGGAGACCCCGACAACCTTCATCCCCGCTAACCCCATGGTGACAC  
CACCTCAC-----  
-----  
-----  
-----

---



**Table S5** Partial control-region sequences (in FASTA format) of humbug damselfish, *Dascyllus abudafur* and *D. aruanus*

| Species,<br>Sequence                                                                                                                                                                                                                                                                                                                                                                                                                                                                                                                                                                                                                                                                                                                                                                                                                                                                                                                                                                                                                                                                                                                                                                                                                                                                                                                                                                                                                                                                                                                                                                                                                                                                                                                                                                                                                                                                                                                                                                                                                                                                                                                                                                                                                                                                                                                                                                                                                                                                                                                                                                                                                                                                                                                                                                                                                                                                                                                                                                                                                                                                                                                                                                                                                                                                                                                                                                                                                                                                                                                                                                                                                                                                                                                                                                                                                                                                                                                                                                                                                                                                                                                                                                                                                                                                                                                                                                                                                                                                                                                                                                                                                                                                                                                                                                                                                                                                                                                                                                                                                                                                                                                                                                                                                                                                                                    |
|-------------------------------------------------------------------------------------------------------------------------------------------------------------------------------------------------------------------------------------------------------------------------------------------------------------------------------------------------------------------------------------------------------------------------------------------------------------------------------------------------------------------------------------------------------------------------------------------------------------------------------------------------------------------------------------------------------------------------------------------------------------------------------------------------------------------------------------------------------------------------------------------------------------------------------------------------------------------------------------------------------------------------------------------------------------------------------------------------------------------------------------------------------------------------------------------------------------------------------------------------------------------------------------------------------------------------------------------------------------------------------------------------------------------------------------------------------------------------------------------------------------------------------------------------------------------------------------------------------------------------------------------------------------------------------------------------------------------------------------------------------------------------------------------------------------------------------------------------------------------------------------------------------------------------------------------------------------------------------------------------------------------------------------------------------------------------------------------------------------------------------------------------------------------------------------------------------------------------------------------------------------------------------------------------------------------------------------------------------------------------------------------------------------------------------------------------------------------------------------------------------------------------------------------------------------------------------------------------------------------------------------------------------------------------------------------------------------------------------------------------------------------------------------------------------------------------------------------------------------------------------------------------------------------------------------------------------------------------------------------------------------------------------------------------------------------------------------------------------------------------------------------------------------------------------------------------------------------------------------------------------------------------------------------------------------------------------------------------------------------------------------------------------------------------------------------------------------------------------------------------------------------------------------------------------------------------------------------------------------------------------------------------------------------------------------------------------------------------------------------------------------------------------------------------------------------------------------------------------------------------------------------------------------------------------------------------------------------------------------------------------------------------------------------------------------------------------------------------------------------------------------------------------------------------------------------------------------------------------------------------------------------------------------------------------------------------------------------------------------------------------------------------------------------------------------------------------------------------------------------------------------------------------------------------------------------------------------------------------------------------------------------------------------------------------------------------------------------------------------------------------------------------------------------------------------------------------------------------------------------------------------------------------------------------------------------------------------------------------------------------------------------------------------------------------------------------------------------------------------------------------------------------------------------------------------------------------------------------------------------------------------------------------------------------------------------------|
| <p><i>Dascyllus abudafur</i><br/>&gt;DZA2 (Zanzibar)</p> <p>GATATAACTAACATTAATTCTTGGTGCTTTAAATAGTTTATAGTATTTAAAAATGTGATTTA<br/>           AAAATGTGAATCTTACAACCTCAACACCTGTTT-GTAGCATTATCCCATAAGCTTGCACCGCT<br/>           ACGTGCATATATGTACATTCACCATAAATCTATATTTAACCATATCATAGAATATTTCAAGTAC<br/>           ATGATTTCAAACCTTTAACTAATATTAAAGTCAAGGATATACTTGTTTTGAAACATTCACCT<br/>           GAATAAAAGGTACATAAACCTCTACATGTGTCAAAAAGCTAAGCGGGTACAGGTAAAAATTT<br/>           AAGATTCAACTGTACATACTCATGGGTCCAGATATACCAAGTATTCAGTACCTCTGCAAG<br/>           TCATATGTTTAAATACAGTAAGA</p> <p>&gt;G lor1 (Glorieuses Islands)</p> <p>GACATAACTAACATTAATTCTTAGTGCTATAAATAGTTTATAGTATTTAAAAATGTGATTTA<br/>           AAAATGTGAATCTTACAACCTCAACACCTGTTT-GTAGCATTATCCCATAAGCTTGCACCGCT<br/>           ACGTGCATATATGTACATTCACCATAAATCTATATTTAACCATATCATAGATATTTAAGTACA<br/>           TGATTTCAAAGCTTTAACTAATACCAAAGTCAAAGGACATACTTGTTTTGAAACATTCACCT<br/>           GAATAAAAGCACATAAACCTCTACATGTATCAAAAAGTAAAGCGGGTACAATTTAAAGATTTA<br/>           AGATTTAACCGTTACATACTCATGGGTTCAGATATACCAAGTATTCAGTACCTCTGCAAGT<br/>           CATATGTTTAAATACAGTAAGAGCCCAGCATCAGTTGATTCCCTGAATGTCCACAGTTCTTGA<br/>           TGGTCAAGGACAGAATAA</p> <p>&gt;G lor2 (Glorieuses Islands)</p> <p>GACATAACTAACATTAATTCTTAGTGCTATAAATAGTTTATAGTATTTAAAAATGTGATTTA<br/>           AAAATGTGAATCTTACAACCTCAACACCTGTTT-GTAGCATTATCCCATAAGCTTGCACCGCT<br/>           ACGTGCATATATGTACATTCACCATAAATCTATATTTAACCATATCATAGATATTTCAAGTACA<br/>           TGATTTCAAAGCTTTAACTAATACCAAAGTCAA-GGATATACTTGTTTTGAAACATTCACCT<br/>           AATAAAAGTACATAAACCTCTACATGTGTCAAAAAGTAAAGCGGGTACAAGTAAAGATTTA<br/>           AGATTTCAACTGTTACATACTCATGAGTTCAGATATACCAAGTATTCAGTACCTCTGCAAGT<br/>           CATATGTTTAAATACAGTAAGAGCCCAGCATCAGTTGATTCCCTAAATGTCCATAGTTCTTGA<br/>           TGGTCAAGGACAGAATAA</p> <p>&gt;Glor3 (Glorieuses Islands)</p> <p>GACATAACTAACATTAATTCTTAGTGCTATAAATAGTTTATAGTATTTAAAAATGTGATTTA<br/>           AAAATATGAAATCTTACAACCTCAACACCTGTTT-GTAGCATTATTTCCATAAGCTTGCACCGCT<br/>           ACGTGCATATATGTACATTCACCATAAATCTATATTTAACCATATCATGGGTACTCAAGTAC<br/>           ATGATTTCAAACCTTTGACTAATATTAAAGTCAA-GGATATACTTGTTTTAAAGCATTTCACCT<br/>           GAATAAAAGTACATAAACCTCTGCATGTGTCAAAAAGGTAAGCGGGTACAACGAAGATTT<br/>           AAGATTCAGTTGTTACATACTCATGGGTCCAGATATACCAAGTACTCAGTACCTCTGCAAG<br/>           TCACATGTTTAAATACAGTAAGAGCCCAGCATCAGTTGATTTCTAAATGTCCACGGTTCTTG<br/>           ATGGTCAAGGACAGAATAA</p> <p><i>Dascyllus aruanus</i><br/>&gt;Phil5 (Philippines)</p> <p>-----TACAACCTCAACACCTG<br/>           TTTTGTAGCATTATCCATAAAGCTTGCACCTTCTACGTGCATATATGTATATTCACCATGAAT<br/>           CTATATTAACCATATCATGGATATTCGAGGTACATGACTTCAAGTCTTAAACCAATCTTAAAAAT<br/>           CAA-GGATATACTTGTTTTAAAGCATTTCACCTAAATAAAAAGTACATGAACCCCTACATGTGT<br/>           CAAAAGGTAAGCGGGCACAAGTAAAAATTTAAGACTCAACCCTTACATACTCATGGGTCT<br/>           AGATATACCAAGTATTCAGTACCTCTGCAAGTACATGTTTAAATACAGTAAGAGCCCAGCA<br/>           TCAGTTGATTTCTAAA-----</p> <p>&gt;Phil11 (Philippines)</p> <p>-----TACAACCTCAACAC-TG<br/>           TTTTGTAGCATTATTCATAAAGCTTGCACCTTCTACGTGCATATATGTATATTCACCATAAAT<br/>           CTATATTAACCATATCATGGATATTCGAGGTACATGACTTCAAGTCTTAAACCAATCTTAAAAAT<br/>           CAA-GGATATGCTTGTTCAAAAGCATTTCACCTAAATAAAAAGTACATAAAACCCCTACATGTG<br/>           TCGAAAAGGTAACGAGTACAAGTAAAAATTTAAGATTTAACCCTTACATACTCATGAGTTC<br/>           AGATATACCAAGTACTCAGCACCTCTGCAAGCCATATGTTTAAATACAGTAAGAGCCCAGCA<br/>           TCAGTTGATTTCTAAA-----</p> <p>&gt;Phil12 (Philippines)</p> <p>-----TACAACCTCAACACCTG<br/>           TTTTGTAGCATTATTCATAAAGCTTGCACCTTCTACGTGCATATATGTATATTCACCATGAAT<br/>           CTATATTAACCATATCATGGATATTCGAGGTACATGACTTCAAGTCTTAAACCAATCTTAAAAAT<br/>           CAA-GGATATACTTGTTTTAAAGCATTTCACCTAAATAAAAAGTACATAAAACCCCTACATGTG<br/>           CAAAAGGTAAGCAGGCACAAGTAAAAATTTA AAAACTCAACCCTTACATACTCATGAGTCCA<br/>           GATATACCAAGTATTCATAACCTCTGCAAGTACATGTTTAAATACAGTAAGAGCCCAGCAT<br/>           CAGTTGATTTCTAAA-----</p> <p>&gt;Phil13 (Philippines)</p> <p>-----TACAACCTCAACACCTG<br/>           TTTTGTAGCATTATTCATAAAGCTTGCACCTTCTACGTGCATATATGTATATTCACCATGAAT<br/>           CTATATTAACCATATCATGGATATTCGAGGTACATGACTTCAAGTCTTAAACCAATCTTAAAAAT<br/>           CAA-GGATATACTTGTTTTAAAGCATTTCACCTAAATAAAAAGTACATAAAACCCCTACATGTG<br/>           CAAAAGGTAAGCAGGCACAAGTAAAAATTTA AAAACTCAACCCTTACATACTCATGAGTCCA<br/>           GATATACCAAGTATTCATAACCTCTGCAAGTACATGTTTAAATACAGTAAGAGCCCAGCAT<br/>           CAGTTGATTTCTAAA-----</p> <p>&gt;Phil20 (Philippines)</p> <p>-----TACAACCTCAACACCTG<br/>           TTTTGTAGCATTATTCATAAAGCTTGCACCTTCTACGTGCATATATGTATATTCACCATGAAT<br/>           CTATATTAACCATATCATGGATATTCGAGGTACATGACTTCAAGTCTTAAACCAATCTTAAAAAT<br/>           TCAA-GGATATACTTGTTTTAAAGCATTTCACCTAAATAAAAAGTACATAAAACCCCTACATGTA<br/>           TCAAAAAGGTAAGCAGGCACAAGTAAAGAAATTTAAGACTCAACCCTTACATACTCATGAGTTC<br/>           AAGATATACCAAGTATTCAGTACCTCTGCAAGTACATGTTTAAATACAGTAAGAGCCCAGC<br/>           ATCAGTTGATTTCTAAA-----</p> <p>&gt;Guam17 (Guam)</p> <p>-----TACAACCTCAACACCTG<br/>           TTTTGTAGCATTATTCATAAAGCTTGCACCTTCTACGTGCATATATGTATATTCACCATGAAT<br/>           CTATATTAACCATATCATGGATATTCGAGGTACATGACTTCAAGCTTAAATTAATCTTAAAAAT</p> |

CAA-GGATATACTTGTTTTAAAGCATTACCTAAATAANAGTACATAAACCCCTACTTGTGC  
CAAAAGGTAAGCGGGTACAAGTAAGAATTTAAGACTTAACCGTTACATACTCATGAGTCC  
AGATATAACCAAGCACTCAGCACCTCTGCAAGTCACATGTTTAATACAGTAAGAGCCCAGCA  
TCAGTTGATTTCTAAA-----

>Fiji14 (Fiji Islands)

-----TACAACCTCAACACCTG  
TTTTGTAGCATTATTCATAAAGATTGCACTTCTACGTGCATATATGTATATTCACCATGAAT  
CTATATTAACCATATCATGGATATTCGAGTACATGATTTCAAGCTTCAACTAATTCTAAAAAT  
TAA-GGGCATACTTGTTTTAAAGCATTACCTAAATAAAAAGTACATAAACCCCTACATGTGT  
CAAAAGGTAAGCAAGGACAAGTAAAAATTTAAGACTCAACCGTTACATACTCAGGAGTCC  
AGATATAACCAAGTATTCAGTACCTCTGCAAGTCACATGTTTAATACAGTAAGAGCCCAGCA  
TCAGTTGATTTCTAAA-----

>Fiji18 (Fiji Islands)

-----TACAACCTCAACACCTG  
TTTTGTAGCATTATTTTCATAAAGCTTGCCTTCTACGTGCATATATGTATATTCACCATGAAT  
CTATATTAACCATATCATGGATATTCGAGTACATGATTTCAAGCTTTAACTAATCTTAAAAAT  
CAA-GGACATACTTGTTTTCAAAGCATTATCTAGATAAAAAGTACATAAACCCCCACATGTG  
TCAAAAAGGTAAGCAGGCACAAGTAAAAATTTAAGATTCAACCGTTACATACTCACAAGTCC  
AGATATAACCAAGTATTCAAATACCTCTGCAAGTCACATGTTTAATACAGTAAGAGCCCAGCA  
TCAGTTGATTTCTAAA-----

---

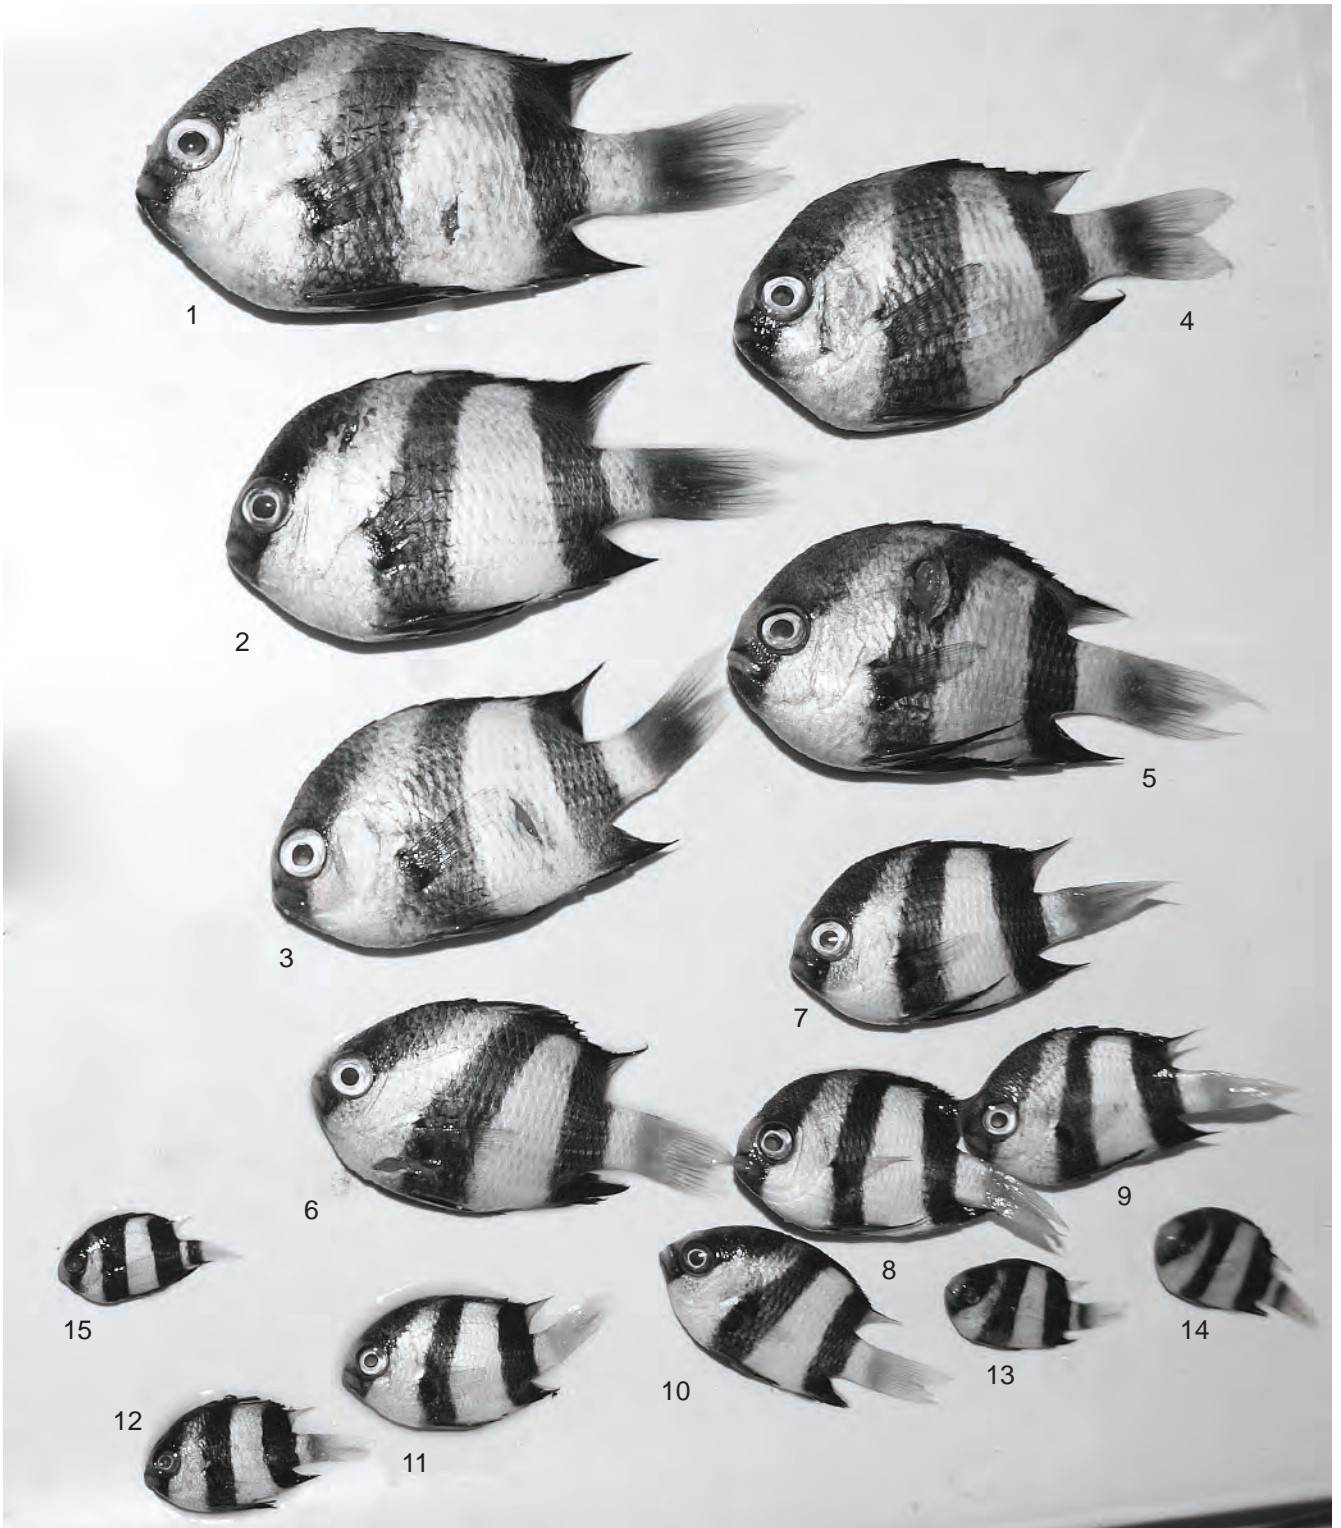

**Fig. S1** *Dascyllus abudafur*. Individuals no Europa 1-15 from Europa Island, Mozambique Channel, 06 April 2011 (WJC).



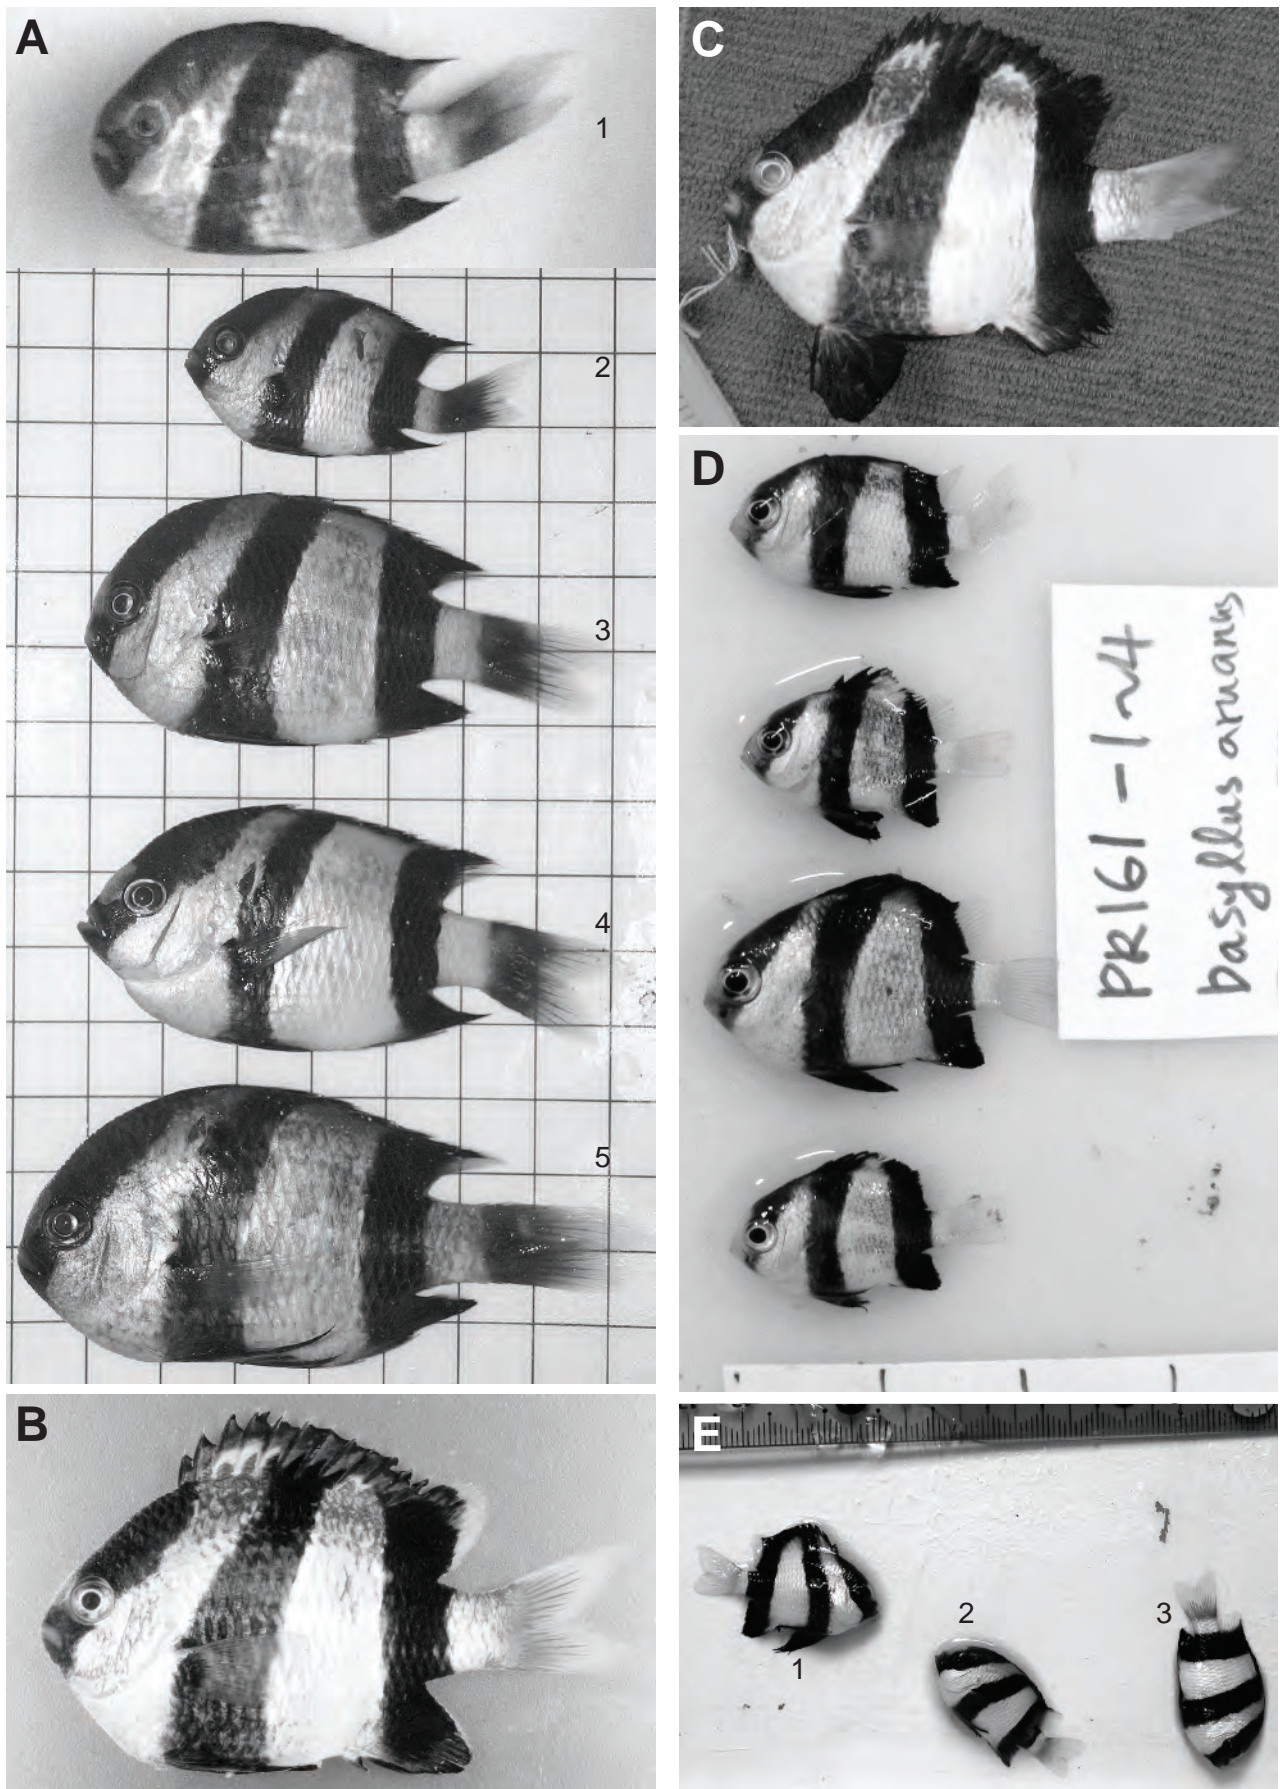

**Fig. S2** Humbug damselfish. **A** *Dascyllus abudafur*, individuals nos. JdN 1-5 from Juan de Nova Island, Mozambique Channel, 11-12 April 2011 (PB, WJC). **B** *Dascyllus aruanus*, individual no. 042913-06 from Dongsha, South China Sea, 29 April 2013 (WJC). **C** *Dascyllus aruanus*, individual no. WJC2243 from Dongsha, South China Sea, 09 May 2013 (WJC). **D** *Dascyllus aruanus*, individuals nos. PR161-1 to 4 from Madang, Bismarck Sea, Papua New Guinea, December 2012 (WJC). **E** *Dascyllus abudafur*, individuals nos. Bali 1-3 from Singaraja, Bali Island, April 2014 (PB, AS).



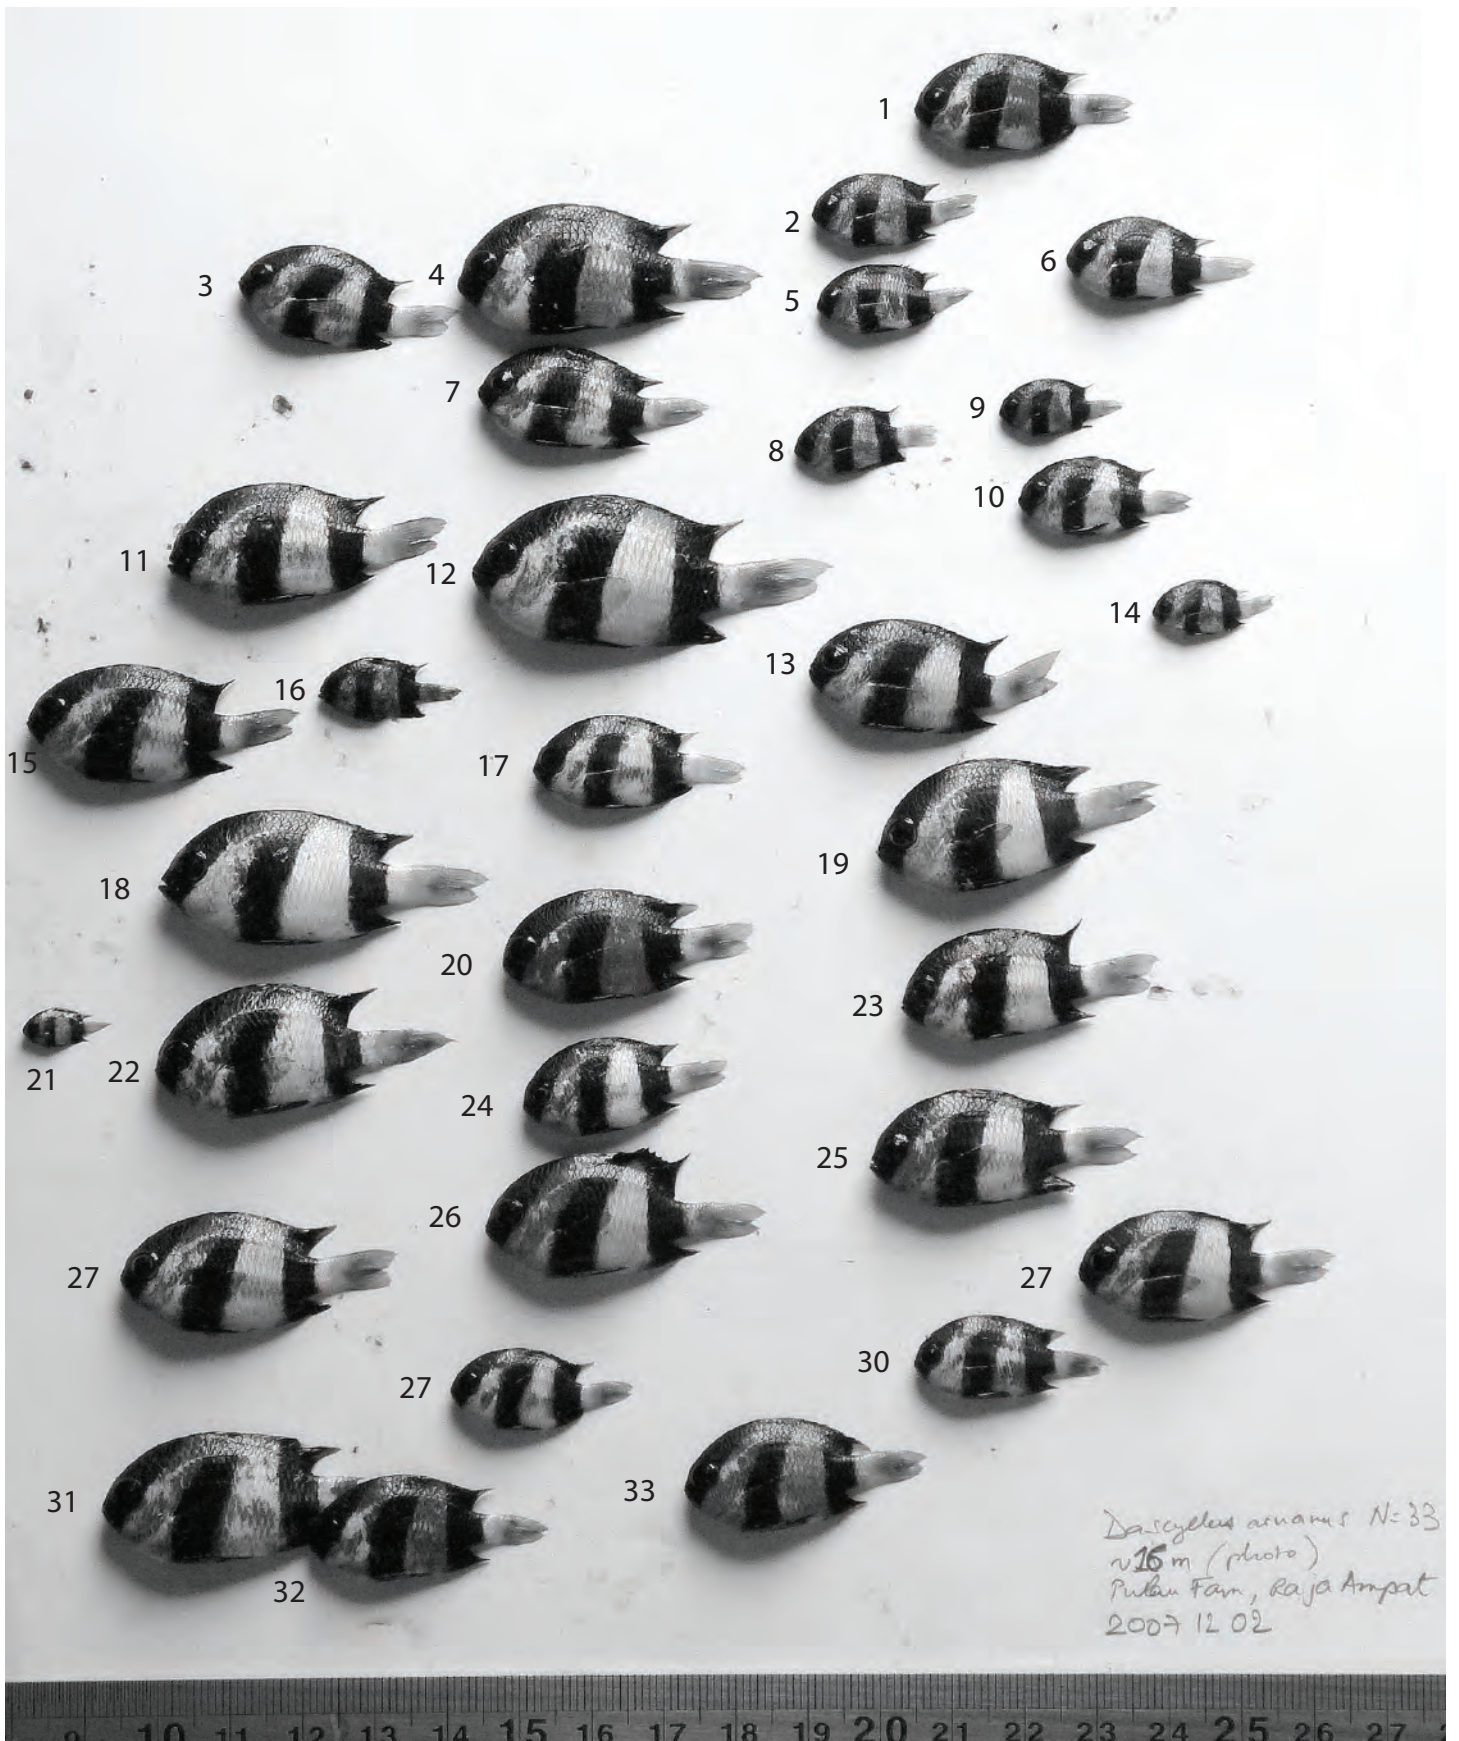

Fig. S3 *Dascyllus aruanus*. Individuals nos. Fam 1-33 from Pulau Fam, Raja Ampat, West Papua, 02 December 2007 (PB).



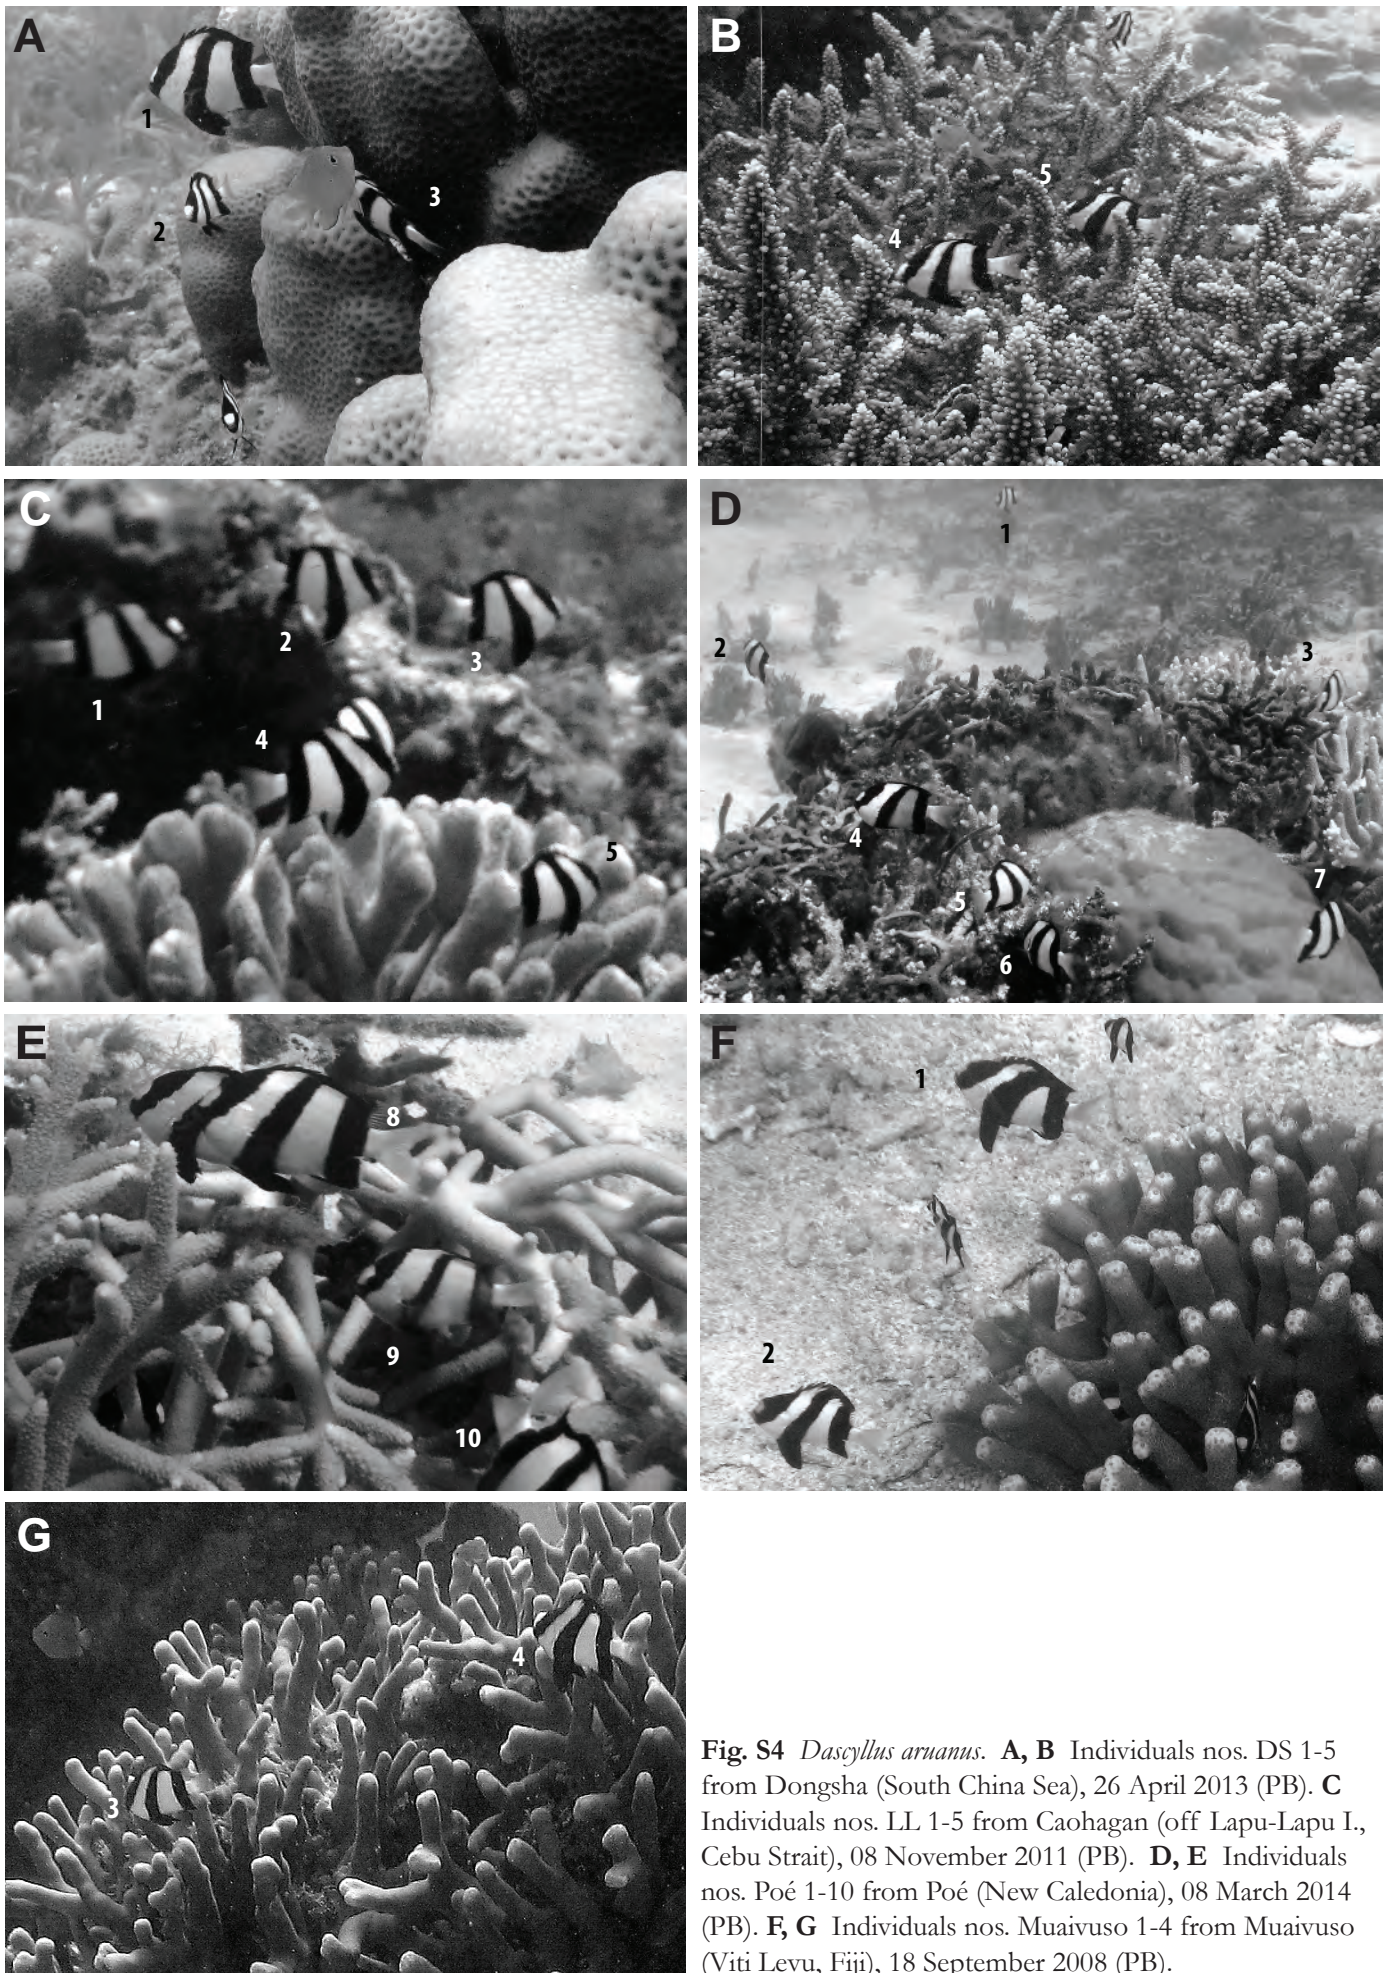

**Fig. S4** *Dascyllus aruanus*. **A, B** Individuals nos. DS 1-5 from Dongsha (South China Sea), 26 April 2013 (PB). **C** Individuals nos. LL 1-5 from Caohagan (off Lapu-Lapu I., Cebu Strait), 08 November 2011 (PB). **D, E** Individuals nos. Poé 1-10 from Poé (New Caledonia), 08 March 2014 (PB). **F, G** Individuals nos. Muaiivuso 1-4 from Muaiivuso (Viti Levu, Fiji), 18 September 2008 (PB).



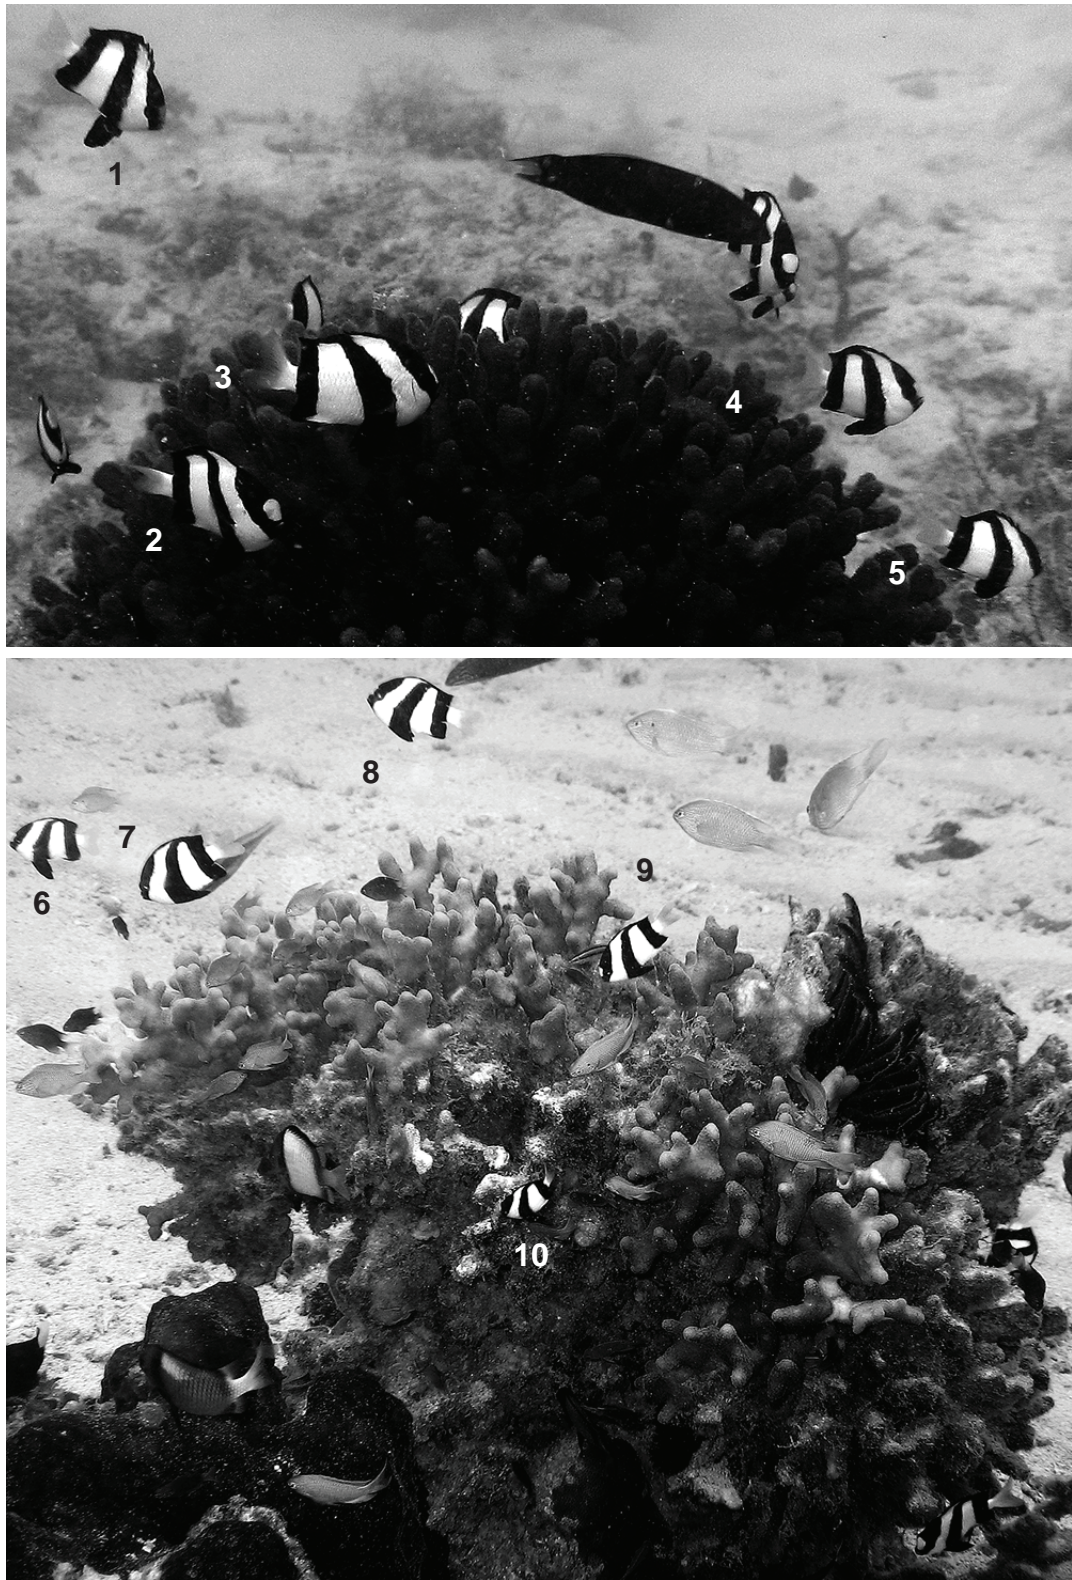

**Fig. S5** *Dascyllus aruanus*. Individuals nos. SWLagoon 1-10 from the southwestern lagoon of New Caledonia. **A** 14 March 2008 (PB). **B** 07 April 2008 (PB).



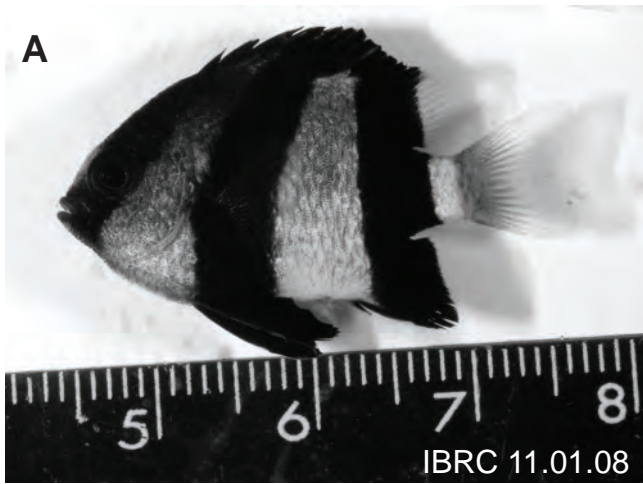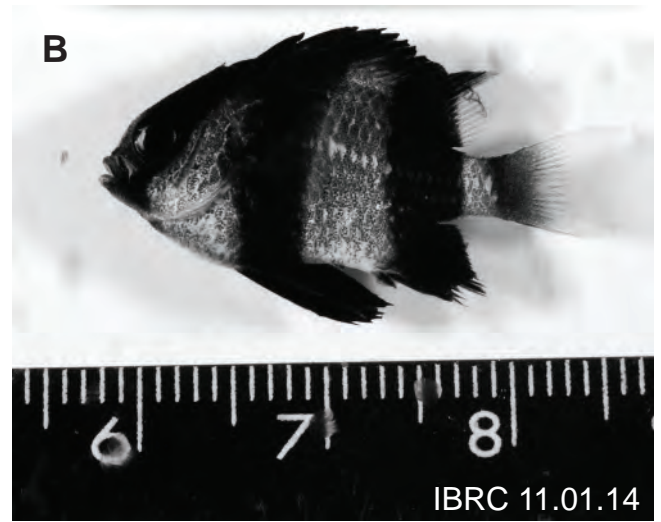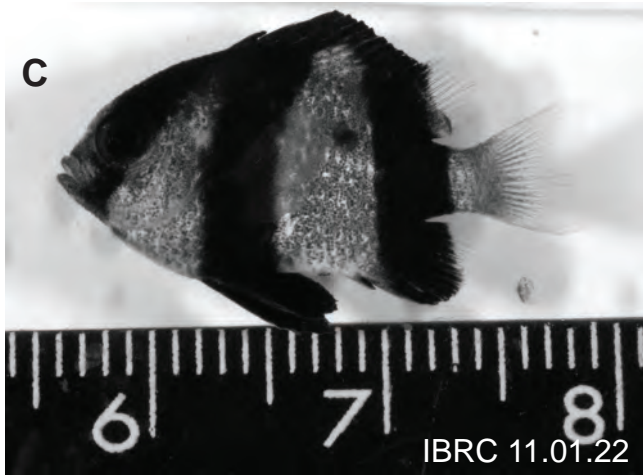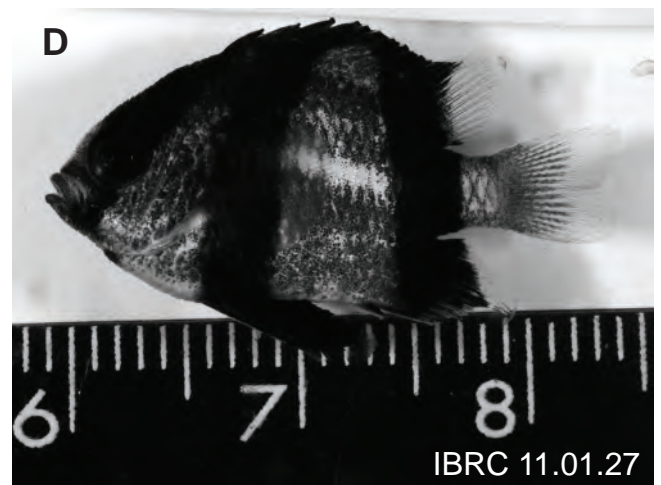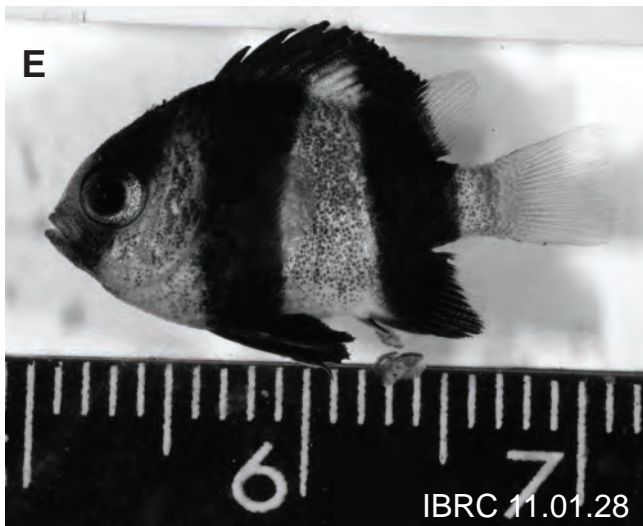

**Fig. S6 A-E** Humbug damselfish specimens nos. IBRC 11.01.08 14, 22, 27 and 28 from Serangan (south-eastern Bali Island), Lombok Strait, April 2014. Scale in cm (AS).



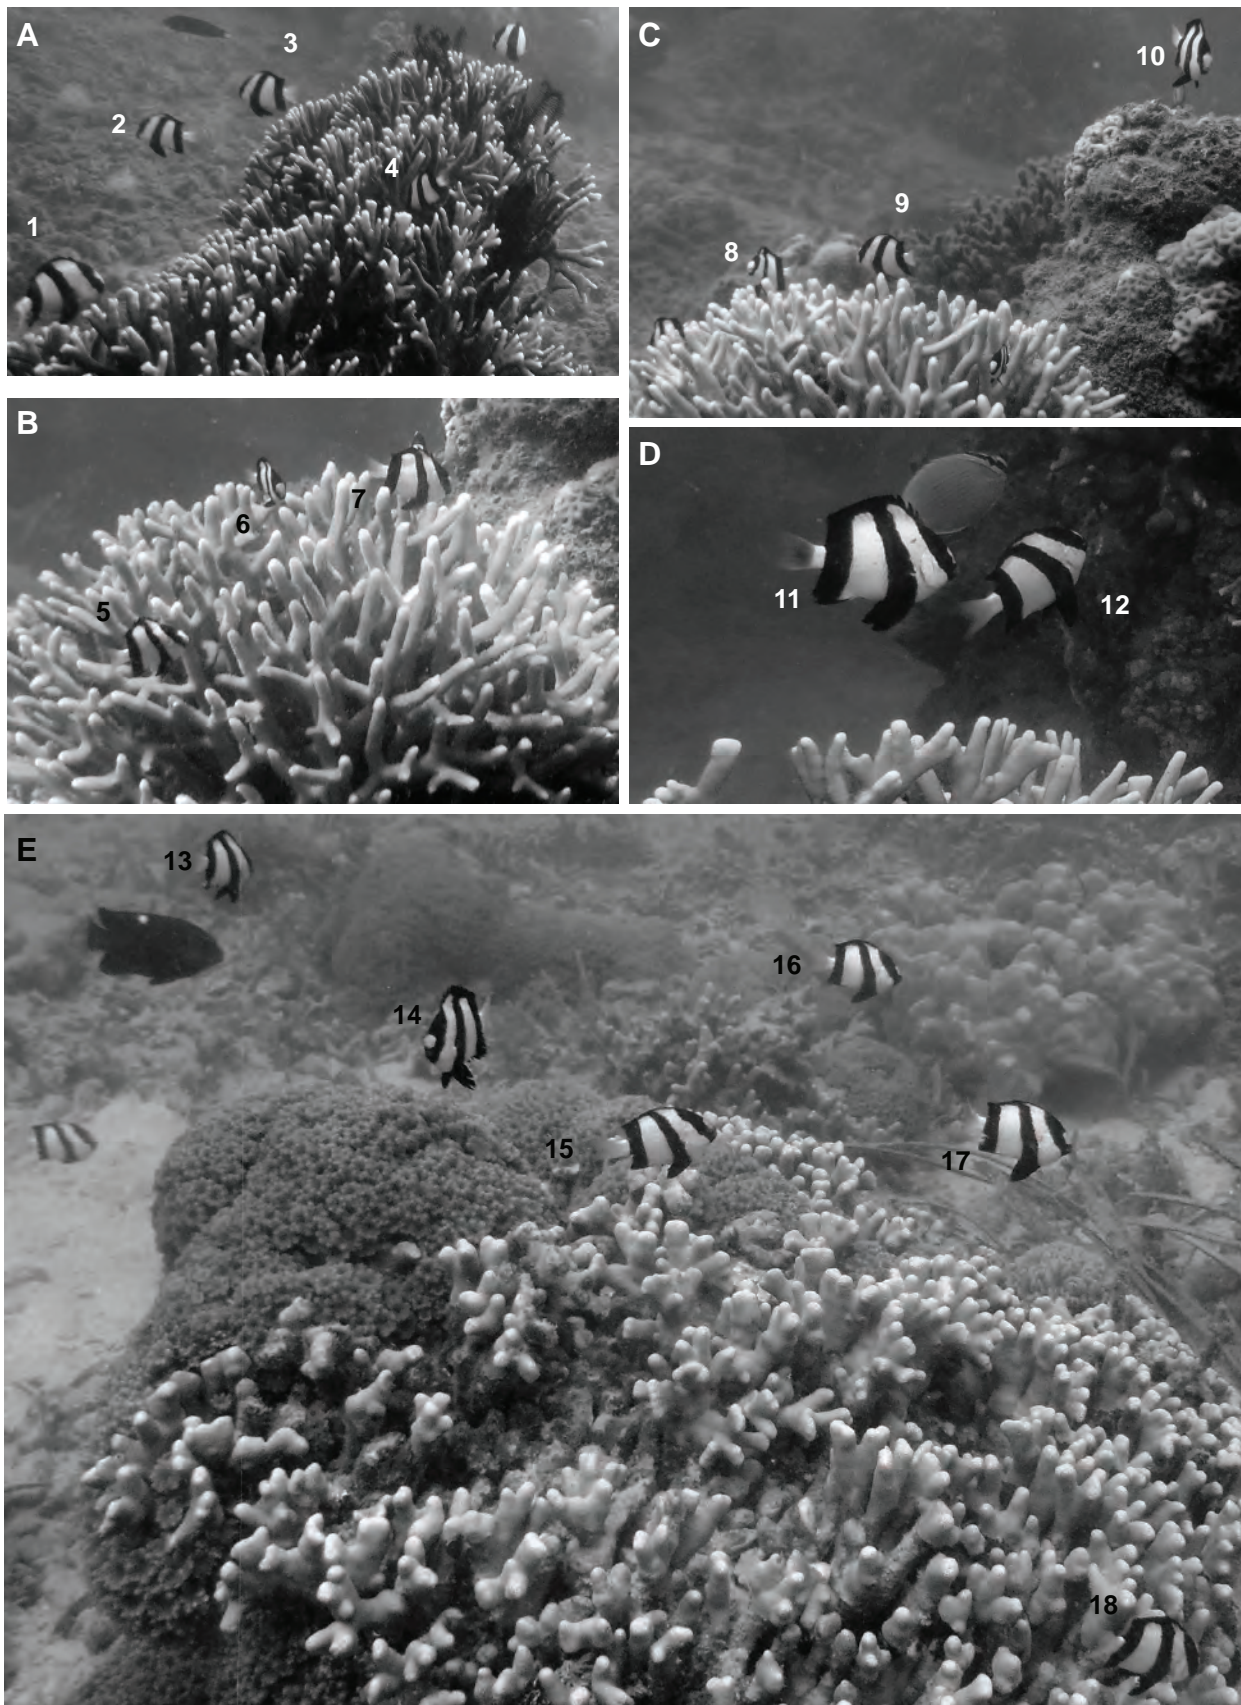

**Fig. S7** Humbug damselfish, *Dascyllus abudafur* and *D. aruanus*. Individuals nos. Lombok 1-18 examined for pigmentation patterns (PB). **A-D** Individuals sighted on the fringing reef at the southern tip of Gili Gede ( $08^{\circ}46'S$   $115^{\circ}56'E$ ), 06 August 2014. **E** Individuals sighted on the reef off southeastern Gili Layar ( $08^{\circ}44'S$   $115^{\circ}55'E$ ), 07 August 2014.
